# Supplementary material for: Tracking spatiotemporal dynamics of crop-specific areas through machine learning and statistics disaggregating
Source: Copernicus journal article supplement (doi:10.5194/essd-2024-233), 2024-07-18
Supplement: Supplementary file 1 [file essd-2024-233-supplement.pdf]

## **Supplement Information**

### **S1. Overview of crop type mapping products**

Here, we listed the crop type maps produced by previous studies in Table S1, as a supplement to Introduction. We collected information of each dataset about several aspects including year period, spatial coverage, resolution, crop type, etc. Among them, there are some datasets that are produced by statistics allocation and are given relatively detailed description in the Introduction for they are closely related to this study's mapping framework. While there are other datasets that are produced by remote sensing, which provide key information of timely spatial distribution of crop-specific areas. Due to the crop statistics are relatively even in space, we further analyzed information coverage of crop distribution in global countries (Figure S1) based on datasets produced by remote sensing (medium and high resolution crop mapping products). As for crop type, we calculated the sum of crop types in each country covered by medium and high resolution crop mapping products. While as for year coverage, we calculated the median value of year coverage of these datasets in each country (With one crop as the minimum unit, if a dataset contains N crops, it is calculated as N datasets), which means if only one crop has a dataset covering a long time series, and the rest have only a single year of mapping or no dataset has yet been published, it will be calculated as 1 or 0 years.

According to the information coverage of crop distribution calculated above, three regions were selected as study areas, respectively Africa, China, and USA. They correspond to three conditions of the information coverage of crop distribution (low, median, and high). In Africa, there are only crop statistics provided in mostly areas. While in China, except for statistics, there have been many studies producing single-type crop maps in recent years but not integrated multi-type maps. But in USA, Crop Data Layer product (CDL) provides annual-update ground truth layer covering the whole crop categories.

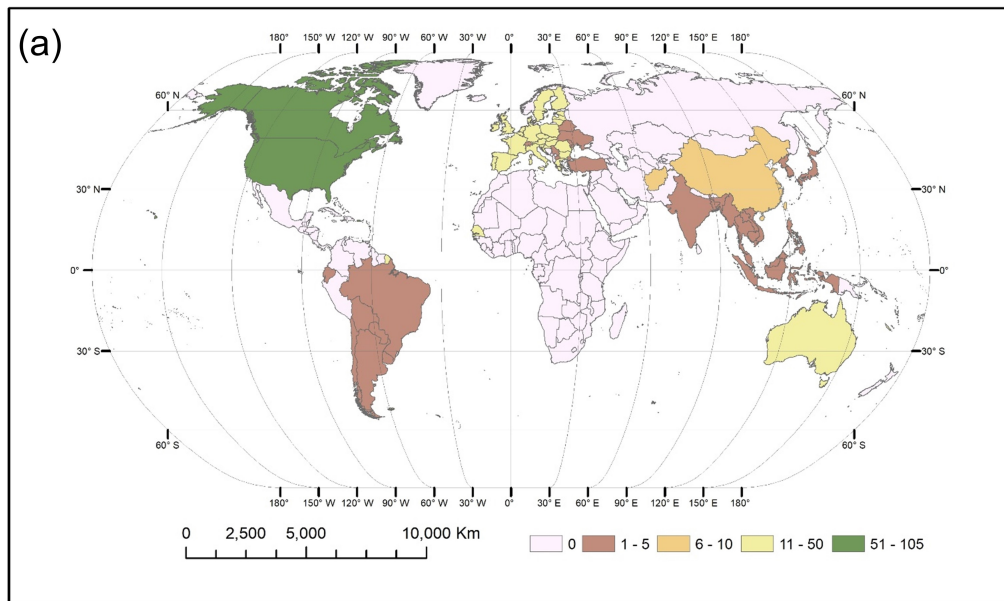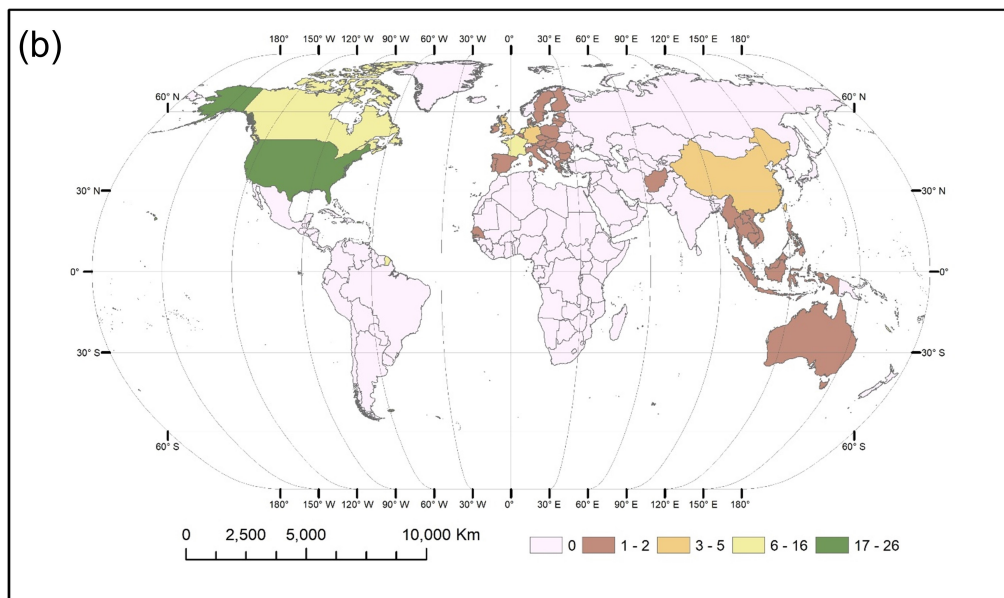

Fig S1 Global information coverage of crop distribution. Crop types (Fig S1a) and year (Fig S1b) coverage of medium and high resolution crop mapping products.

Table S1. Overview of crop type mapping products

| Datasets        | Year period      | Spatial coverage               | Spatial scale | Resolution  | Crop type                   | num of crop types | Reference                                |
|-----------------|------------------|--------------------------------|---------------|-------------|-----------------------------|-------------------|------------------------------------------|
| Leff            | 1990             | Global                         | Global        | 5 Arcmin    | Multi types(18)             | 18                | Leff et al. (2004) <sup>1</sup>          |
| M3              | 2000             | Global                         | Global        | 5 Arcmin    | Multi types(175)            | 175               | Monfreda et al. (2008) <sup>2</sup>      |
| MIRCA           | 2000 monthly     | Global                         | Global        | 5 Arcmin    | Multi types(26)             | 26                | Portmann et al. (2010) <sup>3</sup>      |
| SPAM-2000       | 2000             | Global                         | Global        | 5 Arcmin    | Multi types(20)             | 20                | You et al. (2014) <sup>4</sup>           |
| SPAM-2005       | 2005             | Global                         | Global        | 5 Arcmin    | Multi types(42)             | 42                | IFPRI. (2016) <sup>5</sup>               |
| SPAM-2010       | 2010             | Global                         | Global        | 5 Arcmin    | Multi types(42)             | 42                | Yu et al. (2020) <sup>6</sup>            |
| SPAM-AF17       | 2017             | Africa                         | Africa        | 5 Arcmin    | Multi types(42)             | 42                | IFPRI. (2020) <sup>7</sup>               |
| GAEZ            | 2000, 2010       | Global                         | Global        | 5 Arcmin    | Multi types(23)             | 23                | Fischer et al. (2021) <sup>8</sup>       |
| GAEZ+2015       | 2015 monthly     | Global                         | Global        | 5 Arcmin    | Multi types(26)             | 26                | Gorgon et al. (2022) <sup>9</sup>        |
| GEOGLAM-BACS    | 2020             | Global                         | Global        | 0.05 degree | rice, maize, soybean, wheat | 4                 | Becker-Reshef et al.(2023) <sup>10</sup> |
| Ray-Stat        | 1961-2008        | Global                         | Global        | adm level   | rice, maize, soybean, wheat | 4                 | Ray et al. (2012) <sup>11</sup>          |
| PCAM            | 1961-2014        | Global                         | Global        | 0.5 degree  | Multi types(17)             | 17                | Jackson et al. (2019) <sup>12</sup>      |
| IAGSA-HLJ       | 2011             | Heilongjiang, China            | Provincial    | 500m        | rice, maize, soybean        | 3                 | Hu et al. (2021) <sup>13</sup>           |
| CropPheStat-CHN | 2000, 2010, 2015 | China                          | National      | 1km         | Multi types(14)             | 14                | Wang et al. (2022) <sup>14</sup>         |
| WheatDL-USA     | 2001-2017        | Kansas and northern Texas, USA | Provincial    | 250m        | winter wheat                | 1                 | Zhong et al. (2019) <sup>15</sup>        |
| CROPGRIDS       | 2020             | Global                         | Global        | 0.05 degree | Multi types(173)            | 173               | Tang et al. (2024) <sup>16</sup>         |
| USA-CDL         | 1997-2022        | USA                            | National      | 30m         | Multi types(105)            | 105               | Boryan et al. (2011) <sup>17</sup>       |
| CA-ACI          | 2009-2021        | Canada                         | National      | 30m         | Multi types(52)             | 52                | Fisette et al. (2013) <sup>18</sup>      |

| Datasets          | Year period | Spatial coverage              | Spatial scale | Resolution | Crop type                            | num of crop types | Reference                                  |
|-------------------|-------------|-------------------------------|---------------|------------|--------------------------------------|-------------------|--------------------------------------------|
| ENG-CROME         | 2016-2020   | England                       | National      | 90m        | Multi types(50)                      | 50                | Agrimetrics (2023) <sup>19</sup>           |
| FR-RPG            | 2006-2021   | France                        | National      | vector     | Multi types(22)                      | 22                | Géoservices (2023) <sup>20</sup>           |
| NLD-BRP           | 2009-2023   | Netherlands                   | National      | vector     | Multi types(20)                      | 20                | PDOK (2023) <sup>21</sup>                  |
| Germany           | 2017-2019   | Germany                       | National      | 10m        | Multi types(24)                      | 24                | Blickensdröfer et al. (2022) <sup>22</sup> |
| EU18              | 2018        | European Union countries (28) | Regional      | 10m        | Multi types(18)                      | 18                | d'Andrimont et al. (2021) <sup>23</sup>    |
| AFG               | 2020        | Afghanistan                   | National      | 10m        | Multi types(6)                       | 6                 | FAO (2021) <sup>24</sup>                   |
| Senegal           | 2018        | Senegal                       | National      | 10m        | Multi types(22)                      | 22                | FAO (2021) <sup>25</sup>                   |
| Ecuador           | 2021        | Ecuador                       | National      | 10m        | rice, maize                          | 2                 | FAO (2021) <sup>26</sup>                   |
| Australia         | 2010, 2015  | Australia                     | National      | 250m       | Multi types(25)                      | 25                | ABARS (2022) <sup>27</sup>                 |
| Japan_Rice        | 2018-2020   | Japan                         | National      | 10m        | rice                                 | 1                 | JAXA EORA (2021) <sup>28</sup>             |
| OPG               | 2019        | Global                        | Global        | 10m        | oilpalm                              | 1                 | Descals et al. (2021) <sup>29</sup>        |
| OPGA              | 1982-2019   | Global                        | Global        | 30m        | Multi types(tree crops like oilpalm) | 190               | Du et al. (2022) <sup>30</sup>             |
| RAPG10            | 2017-2019   | Global                        | Global        | 10m        | rapeseed                             | 1                 | Han, et al. (2021) <sup>31</sup>           |
| SASOY             | 2000-2021   | South America                 | Continental   | 30m        | soybean                              | 1                 | Song et al. (2021) <sup>32</sup>           |
| OP3C              | 1984-2017   | Indonesia, Malaysia, Thailand | Regional      | 30m        | oilpalm                              | 1                 | Danylo et al. (2021) <sup>33</sup>         |
| ASIARICE          | 2000-2020   | Asia                          | Continental   | 500m       | rice                                 | 1                 | Han, et al. (2022) <sup>34</sup>           |
| COCOA             | 2019        | Cote d'Ivoire, Ghana          | Regional      | 10m        | cocoa                                | 1                 | Abu et al. (2021) <sup>35</sup>            |
| CHN_MZ_500m_15-17 | 2005-2017   | China                         | National      | 500m       | maize                                | 1                 | Qiu et al. (2018) <sup>36</sup>            |
| CHN_Pattern       | 2015-2021   | China                         | National      | 500m       | Multi types(rice, maize, soybean)    | 3                 | Qiu et al. (2022) <sup>37</sup>            |



| Datasets                 | Year period | Spatial coverage                   | Spatial scale | Resolution | Crop type                        | num of crop types | Reference                          |
|--------------------------|-------------|------------------------------------|---------------|------------|----------------------------------|-------------------|------------------------------------|
| SouthAsia_Rice_17        | 2017        | Bangladesh, northeast India        | Regional      | 10m        | rice                             | 1                 | Singha et al. (2019) <sup>38</sup> |
| CHN_Wheat_17             | 2017-2018   | North China                        | Regional      | 20m        | winter wheat                     | 1                 | Dong et al. (2020) <sup>39</sup>   |
| CHN_Rapeseed_17-21       | 2017-2021   | China                              | National      | 20m        | rapeseed                         | 1                 | Zang et al. (2023) <sup>40</sup>   |
| CHN_NE_10m_17-19         | 2017-2019   | Northeast China                    | Regional      | 10m        | maize, soybean, rice             | 3                 | You et al. (2021) <sup>41</sup>    |
| CHN_NE_30m_13-21         | 2013-2021   | Northeast China                    | Regional      | 30m        | maize, soybean, rice             | 3                 | Xuan et al. (2023) <sup>42</sup>   |
| CHNCropArea1 km          | 2000-2015   | China                              | National      | 1000m      | maize, rice, wheat               | 3                 | Luo et al. (2020) <sup>43</sup>    |
| CHN_winter_wheat_16-20   | 2016-2020   | China                              | National      | 30m        | whint wheat                      | 1                 | Dong et al. (2020) <sup>44</sup>   |
| CHN_double_rice_16-20    | 2016-2020   | China                              | National      | 10m        | double season rice               | 1                 | Pan et al. (2021) <sup>45</sup>    |
| CHN_maize_30m_16-20      | 2016-2020   | China                              | National      | 30m        | maize                            | 1                 | Shen et al. (2022) <sup>46</sup>   |
| Brazil_sugarcane_16-19   | 2016–2019   | Brazil                             | National      | 30m        | sugarcane                        | 1                 | Zheng et al. (2022) <sup>47</sup>  |
| CHN_sugarcane_16-20      | 2016-2020   | China                              | National      | 30m        | sugarcane                        | 1                 | Zheng et al. (2022) <sup>48</sup>  |
| Europe_winterwheat_16-20 | 2016-2020   | Europe                             | Continental   | 30m        | winter wheat                     | 1                 | Huang et al. (2022) <sup>49</sup>  |
| USA-CSDL                 | 1999-2018   | USA middle west                    | Regional      | 30m        | soybean, maize                   | 2                 | Wang et al. (2020) <sup>50</sup>   |
| CHN_RapeSeed_Yangtze_10m | 2017-2021   | Yangtze River Economic Belt, China | Regional      | 10m        | rapeseed                         | 1                 | Liu et al. (2023) <sup>51</sup>    |
| Southeast Asia_Rice      | 2019        | Southeast Asia                     | Regional      | 20m        | rice                             | 1                 | Sun et al. (2023) <sup>52</sup>    |
| CHN_soybean_10m_19       | 2019        | China                              | National      | 10m        | soybean, maize                   | 2                 | Li et al. (2023) <sup>53</sup>     |
| NESEA_Rice10             | 2017-2019   | Northeast Asia, Southeast Asia     | Continental   | 10m        | rice                             | 1                 | Han et al. (2021) <sup>54</sup>    |
| EU18_4                   | 2018        | Europe (10 countries)              | Regional      | 10m        | maize, rapeseed, triticeae crops | 4                 | Luo et al. (2022) <sup>55</sup>    |
| CHN_Cotton               | 2018-2021   | Xinjiang, China                    | Provincial    | 10m        | cotton                           | 1                 | Kang et al. (2023) <sup>56</sup>   |

| <b>Datasets</b>       | <b>Year period</b> | <b>Spatial coverage</b> | <b>Spatial scale</b> | <b>Resolution</b> | <b>Crop type</b>   | <b>num of crop types</b> | <b>Reference</b>                  |
|-----------------------|--------------------|-------------------------|----------------------|-------------------|--------------------|--------------------------|-----------------------------------|
| CHN_maize_30m_13-21   | 2013-2021          | Northern China          | Regional             | 30m               | maize              | 1                        | Xin et al. (2023) <sup>57</sup>   |
| CHN_maize_10m_17-21   | 2017-2021          | China                   | National             | 10m               | maize              | 1                        | Li et al. (2023) <sup>58</sup>    |
| CHN_single_rice_17-22 | 2017-2022          | China                   | National             | 10m               | single season rice | 1                        | Shen et al. (2023) <sup>59</sup>  |
| CHN_rapeseed_00-22    | 2000-2022          | China                   | National             | 30m               | rapeseed           | 1                        | Liu et al. (2024) <sup>60</sup>   |
| CHN_maize_30m_01-20   | 2001-2020          | China                   | National             | 30m               | maize              | 1                        | Peng et al. (2023) <sup>61</sup>  |
| CHN_soy_10m_19-22     | 2019-2022          | China                   | National             | 10m               | soybean            | 1                        | Zhang et al. (2024) <sup>62</sup> |

## **S2. Crop categories**

There are very different definitions of crop categories among multiple sources of data products. Here, we relate other data sources based on SPAM product crop categories. Table S2-1 lists the SPAM crop names and their respective FAO code (corresponding to FAOSTAT). Table S2-2 lists the SPAM crop names and their respective USDA crop name and CDL values (corresponding to USA Statistics and maps). Table S2-3 lists the SPAM crop names and their respective China statistic crop name (corresponding to China Statistics). Table S2-4 lists the SPAM crop names and their respective GAEZ crop name (corresponding to GAEZ crop categories).

Table S2-1. SPAM product crop categories (corresponding to FAOSTAT)

| ID | Long Name     | Short Name | Group          | FAO Crop code                    |
|----|---------------|------------|----------------|----------------------------------|
| 1  | wheat         | whea       | Cereals        | 15                               |
| 2  | rice          | rice       | Cereals        | 27                               |
| 3  | maize         | maiz       | Cereals        | 56                               |
| 4  | barley        | barl       | Cereals        | 44                               |
| 5  | pearl millet  | pmil       | Cereals        | 79                               |
| 6  | small millet  | smil       | Cereals        | 79                               |
| 7  | sorghum       | sorg       | Cereals        | 83                               |
| 8  | other cereals | ocer       | Cereals        | 68,71,75,89,92,94,97,101,103,108 |
| 9  | potato        | pota       | Roots & Tubers | 116                              |
| 10 | sweet potato  | swpo       | Roots & Tubers | 122                              |
| 11 | yams          | yams       | Roots & Tubers | 137                              |
| 12 | cassava       | cass       | Roots & Tubers | 125                              |
| 13 | other roots   | orts       | Roots & Tubers | 135,136,149                      |
| 14 | bean          | bean       | Pulses         | 176                              |
| 15 | chickpea      | chic       | Pulses         | 191                              |
| 16 | cowpea        | cowp       | Pulses         | 195                              |
| 17 | pigeonpea     | pige       | Pulses         | 197                              |
| 18 | lentil        | lent       | Pulses         | 201                              |
| 19 | other pulses  | opul       | Pulses         | 181,187,203,205,210,211          |
| 20 | soybean       | soyb       | Oilcrops       | 236                              |
| 21 | groundnut     | grou       | Oilcrops       | 242                              |
| 22 | coconut       | cnut       | Oilcrops       | 249                              |
| 23 | oilpalm       | oilp       | Oilcrops       | 254                              |

| ID | Long Name                 | Short Name | Group       | FAO Crop code                                                                                               |
|----|---------------------------|------------|-------------|-------------------------------------------------------------------------------------------------------------|
| 24 | sunflower                 | sunf       | Oilcrops    | 267                                                                                                         |
| 25 | rapeseed                  | rape       | Oilcrops    | 270,292                                                                                                     |
| 26 | sesameseed                | sesa       | Oilcrops    | 289                                                                                                         |
| 27 | other oil crops           | ooil       | Oilcrops    | 260,263,265,275,280,296,299,333,336,339                                                                     |
| 28 | sugarcane                 | sugc       | Sugar Crops | 156                                                                                                         |
| 29 | sugarbeet                 | sugb       | Sugar Crops | 157                                                                                                         |
| 30 | cotton                    | cott       | Fibres      | 328                                                                                                         |
| 31 | other fibre crops<br>ofib | ofib       | Fibres      | 773,777,780,782,788,789,800,809,821                                                                         |
| 32 | arabica coffee            | acof       | Stimulates  | 656                                                                                                         |
| 33 | robusta coffee            | rcof       | Stimulates  | 656                                                                                                         |
| 34 | cocoa                     | coco       | Stimulates  | 661                                                                                                         |
| 35 | tea                       | teas       | Stimulates  | 667                                                                                                         |
| 36 | tobacco                   | toba       | Stimulates  | 826                                                                                                         |
| 37 | banana                    | bana       | Fruits      | 486                                                                                                         |
| 38 | plantain                  | plnt       | Fruits      | 489                                                                                                         |
| 39 | tropical fruit            | trof       | Fruits      | 490,491,492,493,494,495,497,507,512,567,568,569,571,572,574,577,587,591,600,693                             |
| 40 | temperate fruit           | temf       | Fruits      | 515,521,523,526,530,531,534,536,541,542,544,547,549,550,552,554,558,560,592,619                             |
| 41 | vegetables                | vege       | Vegetables  | 358,366,367,372,373,388,393,394,397,399,401,402,406,407,414,417,420,423,426,430,<br>446,449,459,461,463     |
| 42 | rest of crops             | rest       | Rest        | 161,216,217,220,221,222,223,224,225,226,234,671,677,687,689,692,693,698,702,711,<br>720,723,748,754,836,839 |

Table S2-2. SPAM product crop categories (corresponding to USA Statistics and maps)

| ID | Long Name     | Short Name | Group          | USDA Crop Name | CDL Value                             |
|----|---------------|------------|----------------|----------------|---------------------------------------|
| 1  | wheat         | whea       | Cereals        | WHEAT          | 22,23,24,26,225,230,234,236,238       |
| 2  | rice          | rice       | Cereals        | RICE           | 3                                     |
| 3  | maize         | maiz       | Cereals        | CORN           | 1,225,226,228,237,241                 |
| 4  | barley        | barl       | Cereals        | BARLEY         | 21,233,235,237,254                    |
| 5  | pearl millet  | pmil       | Cereals        | MILLET         | 29                                    |
| 6  | small millet  | smil       | Cereals        | MILLET         | 29                                    |
| 7  | sorghum       | sorg       | Cereals        | SORGHUM        | 4,234,235,236                         |
| 8  | other cereals | ocer       | Cereals        |                | 12,13,25,27,28,39,205,226,228,231,240 |
| 9  | potato        | pota       | Roots & Tubers |                | 43                                    |
| 10 | sweet potato  | swpo       | Roots & Tubers |                | 46                                    |
| 11 | yams          | yams       | Roots & Tubers |                |                                       |
| 12 | cassava       | cass       | Roots & Tubers |                |                                       |
| 13 | other roots   | orts       | Roots & Tubers |                |                                       |
| 14 | bean          | bean       | Pulses         | BEANS          | 42                                    |
| 15 | chickpea      | chic       | Pulses         | CHICKPEAS      | 51                                    |
| 16 | cowpea        | cowp       | Pulses         |                |                                       |
| 17 | pigeonpea     | pige       | Pulses         |                |                                       |
| 18 | lentil        | lent       | Pulses         | LENTILS        | 52                                    |
| 19 | other pulses  | opul       | Pulses         |                | 53,                                   |
| 20 | soybean       | soyb       | Oilcrops       | SOYBEANS       | 5,26,239,240,241,254                  |
| 21 | groundnut     | grou       | Oilcrops       | PEANUTS        | 10                                    |
| 22 | coconut       | cnut       | Oilcrops       |                |                                       |
| 23 | oilpalm       | oilp       | Oilcrops       |                |                                       |

| ID | Long Name                 | Short Name | Group       | USDA Crop Name | CDL Value                                                        |
|----|---------------------------|------------|-------------|----------------|------------------------------------------------------------------|
| 24 | sunflower                 | sunf       | Oilcrops    | SUNFLOWER      | 6                                                                |
| 25 | rapeseed                  | rape       | Oilcrops    |                | 31,34,35                                                         |
| 26 | sesameseed                | sesa       | Oilcrops    |                |                                                                  |
| 27 | other oil crops           | ooil       | Oilcrops    |                | 33,38,211                                                        |
| 28 | sugarcane                 | sugc       | Sugar Crops | SUGARCANE      | 45                                                               |
| 29 | sugarbeet                 | sugb       | Sugar Crops | SUGARBEETS     | 41                                                               |
| 30 | cotton                    | cott       | Fibres      | COTTON         | 2,232,238,239                                                    |
| 31 | other fibre<br>crops ofib | ofib       | Fibres      |                |                                                                  |
| 32 | arabica coffee            | acof       | Stimulates  |                |                                                                  |
| 33 | robusta coffee            | rcof       | Stimulates  |                |                                                                  |
| 34 | cocoa                     | coco       | Stimulates  |                |                                                                  |
| 35 | tea                       | teas       | Stimulates  |                |                                                                  |
| 36 | tobacco                   | toba       | Stimulates  | TOBACCO        | 11                                                               |
| 37 | banana                    | bana       | Fruits      |                |                                                                  |
| 38 | plantain                  | plnt       | Fruits      |                |                                                                  |
| 39 | tropical fruit            | trof       | Fruits      |                | 48,72,209,212,213,215                                            |
| 40 | temperate fruit           | temf       | Fruits      |                | 55,66,67,68,69,75,77,210,217,218,219,220,221,223,242,250         |
| 41 | vegetables                | vege       | Vegetables  |                | 49,50,54,206,207,208,214,216,222,227,229,230,231,232,233,243,244 |
|    |                           |            |             |                | 4,245,246,247,248,249                                            |
| 42 | rest of crops             | rest       | Rest        |                | 14,44,56,74,76,204,224                                           |

Table S2-3. SPAM product crop categories (corresponding to China Statistic)

| ID | SPAM_longName | SPAM_shortName | Group          | CHN Stat Name  | CHN Name | CHN shortName |
|----|---------------|----------------|----------------|----------------|----------|---------------|
| 1  | wheat         | whea           | Cereals        | wheat          | 小麦       | whea          |
| 2  | rice          | rice           | Cereals        | rice           | 稻谷       | rice          |
| 3  | maize         | maiz           | Cereals        | maize          | 玉米       | maiz          |
| 4  | barley        | barl           | Cereals        |                |          |               |
| 5  | pearl millet  | pmil           | Cereals        |                |          |               |
| 6  | small millet  | smil           | Cereals        |                |          |               |
| 7  | sorghum       | sorg           | Cereals        |                |          |               |
| 8  | other cereals | ocer           | Cereals        |                |          |               |
| 9  | potato        | pota           | Roots & Tubers | Roots & Tubers | 薯类       | cass          |
| 10 | sweet potato  | swpo           | Roots & Tubers | Roots & Tubers | 薯类       | cass          |
| 11 | yams          | yams           | Roots & Tubers | Roots & Tubers | 薯类       | cass          |
| 12 | cassava       | cass           | Roots & Tubers | Roots & Tubers | 薯类       | cass          |
| 13 | other roots   | orts           | Roots & Tubers | Roots & Tubers | 薯类       | cass          |
| 14 | bean          | bean           | Pulses         | Pulses         | 豆类       | bean          |
| 15 | chickpea      | chic           | Pulses         | Pulses         | 豆类       | bean          |
| 16 | cowpea        | cowp           | Pulses         | Pulses         | 豆类       | bean          |
| 17 | pigeonpea     | pige           | Pulses         | Pulses         | 豆类       | bean          |
| 18 | lentil        | lent           | Pulses         | Pulses         | 豆类       | bean          |
| 19 | other pulses  | opul           | Pulses         | Pulses         | 豆类       | bean          |
| 20 | soybean       | soyb           | Oilcrops       | soybean        | 大豆       | soyb          |
| 21 | groundnut     | grou           | Oilcrops       | groundnut      | 花生       | grou          |
| 22 | coconut       | cnut           | Oilcrops       |                |          |               |
| 23 | oilpalm       | oilp           | Oilcrops       |                |          |               |



| ID | SPAM_longName          | SPAM_shortName | Group       | CHN Stat Name | CHN Name | CHN shortName |
|----|------------------------|----------------|-------------|---------------|----------|---------------|
| 24 | sunflower              | sunf           | Oilcrops    |               |          |               |
| 25 | rapeseed               | rape           | Oilcrops    | rapeseed      | 油菜籽      | rape          |
| 26 | sesameseed             | sesa           | Oilcrops    |               |          |               |
| 27 | other oil crops        | ooil           | Oilcrops    |               |          |               |
| 28 | sugarcane              | sugc           | Sugar Crops | sugarcane     | 甘蔗       | sugc          |
| 29 | sugarbeet              | sugb           | Sugar Crops | sugarbeet     | 甜菜       | sugb          |
| 30 | cotton                 | cott           | Fibres      | cotton        | 棉花       | cott          |
| 31 | other fibre crops ofib | ofib           | Fibres      | bast fiber    | 麻类       | ofib          |
| 32 | arabica coffee         | acof           | Stimulates  |               |          |               |
| 33 | robusta coffee         | rcof           | Stimulates  |               |          |               |
| 34 | cocoa                  | coco           | Stimulates  |               |          |               |
| 35 | tea                    | teas           | Stimulates  |               |          |               |
| 36 | tobacco                | toba           | Stimulates  | tobacco       | 烤烟       | toba          |
| 37 | banana                 | bana           | Fruits      |               |          |               |
| 38 | plantain               | plnt           | Fruits      |               |          |               |
| 39 | tropical fruit         | trof           | Fruits      |               |          |               |
| 40 | temperate fruit        | temf           | Fruits      |               |          |               |
| 41 | vegetables             | vege           | Vegetables  | vegetables    | 蔬菜       | vege          |
| 42 | rest of crops          | rest           | Rest        |               |          |               |

Table S2-4. SPAM product crop categories (corresponding to GAEZ crop categories)

| ID | SPAM_longName | SPAM_shortName | Group          | GAEZ_longName             | GAEZ_shortName |
|----|---------------|----------------|----------------|---------------------------|----------------|
| 1  | wheat         | whea           | Cereals        | Wheat                     | whe            |
| 2  | rice          | rice           | Cereals        | Wetland rice,Dryland rice | rcw,rcd        |
| 3  | maize         | maiz           | Cereals        | Maize                     | mze            |
| 4  | barley        | barl           | Cereals        | Barley                    | brl            |
| 5  | pearl millet  | pmil           | Cereals        | Pearl millet              | pml            |
| 6  | small millet  | smil           | Cereals        | Foxtail millet            | fml            |
| 7  | sorghum       | sorg           | Cereals        | Sorghum                   | srg            |
| 8  | other cereals | ocer           | Cereals        | Oat                       | oat            |
| 9  | potato        | pota           | Roots & Tubers | White potato              | wpo            |
| 10 | sweet potato  | swpo           | Roots & Tubers | Sweet potato              | spo            |
| 11 | yams          | yams           | Roots & Tubers | Yam                       | yam            |
| 12 | cassava       | cass           | Roots & Tubers | Cassava                   | csv            |
| 13 | other roots   | orts           | Roots & Tubers | Yam                       | yam            |
| 14 | bean          | bean           | Pulses         | Phaseolus bean            | phb            |
| 15 | chickpea      | chic           | Pulses         | Chickpea                  | chk            |
| 16 | cowpea        | cowp           | Pulses         | Cowpea                    | cow            |
| 17 | pigeonpea     | pige           | Pulses         | Pigeonpea                 | pig            |
| 18 | lentil        | lent           | Pulses         | Chickpea                  | chk            |
| 19 | other pulses  | opul           | Pulses         | Chickpea                  | chk            |
| 20 | soybean       | soyb           | Oilcrops       | Soybean                   | soy            |
| 21 | groundnut     | grou           | Oilcrops       | Groundnut                 | grd            |
| 22 | coconut       | cnut           | Oilcrops       | Coconut                   | con            |
| 23 | oilpalm       | oilp           | Oilcrops       | Oil palm                  | olp            |

| ID | SPAM_longName          | SPAM_shortName | Group       | GAEZ_longName | GAEZ_shortName |
|----|------------------------|----------------|-------------|---------------|----------------|
| 24 | sunflower              | sunf           | Oilcrops    | Sunflower     | sfl            |
| 25 | rapeseed               | rape           | Oilcrops    | Rapeseed      | rsd            |
| 26 | sesameseed             | sesa           | Oilcrops    | Rapeseed      | rsd            |
| 27 | other oil crops        | ooil           | Oilcrops    | Olive         | olv            |
| 28 | sugarcane              | sugc           | Sugar Crops | Sugarcane     | suc            |
| 29 | sugarbeet              | sugb           | Sugar Crops | Sugarbeet     | sub            |
| 30 | cotton                 | cott           | Fibres      | Cotton        | cot            |
| 31 | other fibre crops ofib | ofib           | Fibres      | Flax          | flx            |
| 32 | arabica coffee         | acof           | Stimulates  | Coffee        | cof            |
| 33 | robusta coffee         | rcof           | Stimulates  | Coffee        | cof            |
| 34 | cocoa                  | coco           | Stimulates  | Cocoa         | coc            |
| 35 | tea                    | teas           | Stimulates  | Tea           | tea            |
| 36 | tobacco                | toba           | Stimulates  | Tobacco       | tob            |
| 37 | banana                 | bana           | Fruits      | Banana        | ban            |
| 38 | plantain               | plnt           | Fruits      | Banana        | ban            |
| 39 | tropical fruit         | trof           | Fruits      | Banana        | ban            |
| 40 | temperate fruit        | temf           | Fruits      | Maize         | mze            |
| 41 | vegetables             | vege           | Vegetables  | Onion         | oni            |
| 42 | rest of crops          | rest           | Rest        | Maize         | mze            |

### S3. Input spatial data

#### S3-1 Base map

In China, there is still not an integrated multi-type crop map with medium-high spatial resolutions (10-30m). Therefore, we collected multi-source base maps of 8 crop types to produce more accurate and timely references (Table S3-1), as for the rest crop types and the regions that are not covered, we still used SPAM2010 as the base map.

Table 3-1. China crop-type base maps used in this study

| Crop Type | Dataset                | Year      | Resolution | Reference                          |
|-----------|------------------------|-----------|------------|------------------------------------|
| wheat     | CHN_winter_wheat_16-20 | 2016-2020 | 30m        | (Dong et al., 2020) <sup>39</sup>  |
| rice      | CHN_double_rice_16-20  | 2017-2020 | 10m        | (Pan et al., 2021) <sup>45</sup>   |
|           | CHN_single_rice_17-22  | 2017-2020 | 10m        | (Shen et al., 2023) <sup>59</sup>  |
| maize     | CHN_maize_10m_17-21    | 2017-2021 | 10m        | (Li et al., 2023) <sup>58</sup>    |
| soybean   | CHN_NE_10m_17-19       | 2017-2018 | 10m        | (You et al., 2021) <sup>41</sup>   |
|           | CHN_soybean_10m_19     | 2019      | 10m        | (Li et al., 2023) <sup>53</sup>    |
| rapeseed  | CHN_rapeseed_00-22     | 2000-2022 | 30m        | (Liu et al., 2024) <sup>60</sup>   |
| sugarcane | CHN_sugarcane_16-20    | 2016-2020 | 30m        | (Zheng et al., 2022) <sup>48</sup> |
| cotton    | CHN_cotton_XinJiang    | 2018-2021 | 10m        | (Kang et al., 2023) <sup>56</sup>  |
| rest      | SPAM2010               | 2010      | 5 arcmin   | (Yu et al., 2020) <sup>6</sup>     |

#### S3-2 Climate variables

ERA5-Land is a reanalysis dataset providing a consistent view of the evolution of land variables over several decades at an enhanced resolution compared to ERA5. Climate variables used in this study were calculated by certain aggregate methods based on ERA5 variables (Table S3-2). Among them, growing degree days (gdd) is calculated by the following formula, while others were aggregated by summation or average in year series.

$$gdd_{daily} = \min\left(\frac{\min(T_{max}, T_{cap}) + \max(T_{min}, T_{base})}{2} - T_{base}, 0\right) \quad (1)$$

$$gdd = \sum gdd_{daily} \quad (2)$$

Where  $T_{max}$  is the daily maximum temperature,  $T_{min}$  the daily minimum temperature,  $T_{base}$  the baseline temperature, and  $T_{cap}$  the temperature at which the daily maximum is capped. By setting the standard baseline temperature  $T_{base} = 10\text{ }^{\circ}\text{C}$  and cap

temperature  $T_{cap} = 30\text{ }^{\circ}\text{C}$ , we summed  $gdd_{daily}$  in a year to obtain the final amount of annual accumulated heat (gdd). Growing degree days (gdd) is used to measure the accumulated heat experienced by plants in a year, which could be useful in predicting temperature suitable areas for certain crops <sup>63</sup>.

Table S3-2. Descriptions of climate variables

| Variable  | Input ERA5 variable                           | Aggregate method   |
|-----------|-----------------------------------------------|--------------------|
| prec      | total_precipitation_sum                       | Annual summation   |
| temp      | temperature_2m                                | Annual average     |
| gdd       | temperature_2m_min, temperature_2m_max        | Equation (1), (2). |
| radi_down | surface_solar_radiation_downwards_sum         | Annual summation   |
| evap_veg  | evaporation_from_vegetation_transpiration_sum | Annual summation   |

### S3-3 Terrain variables

The Global Multi-resolution Terrain Elevation Data 2010 (GMTED2010) dataset contains elevation data for the globe collected from various sources at 7.5 arc-seconds resolution. Slope variable was calculated by `ee.Algorithms.Terrain()` function using elevation data as input in Google Earth Engine.

### S3-4 Soil variables

OpenlandMap contains soil properties global layers produced based on machine learning predictions from global compilation of soil profiles and samples. 6 variables were selected and 6 standard depths of each were aggregated by a certain method (Table S3-3).

Table S3-3. Descriptions of soil variables

| Variable     | Input OpenlandMap variable                                                                       | Aggregate method |
|--------------|--------------------------------------------------------------------------------------------------|------------------|
| soil_water   | Soil water content (volumetric %) for 33kPa and 1500kPa suctions predicted at 6 standard depths* | Average          |
| soil_texture | Soil texture classes (USDA system) for 6 soil depths                                             | Mode             |

| <b>Variable</b> | <b>Input OpenlandMap variable</b>                             | <b>Aggregate method</b> |
|-----------------|---------------------------------------------------------------|-------------------------|
| soil_sand       | Sand content in % (kg / kg) at 6 standard depths              | Average                 |
| soil_pH         | Soil pH in H <sub>2</sub> O at 6 standard depths              | Average                 |
| soil_orgnC      | Soil organic carbon content in ×5 g / kg at 6 standard depths | Average                 |
| soil_clay       | Clay content in % (kg / kg) at 6 standard depths              | Average                 |

\*6 standard depths: 0, 10, 30, 60, 100, and 200 cm, the same below.

### **S3-5 Suitability**

GAEZv4.0 produces a gridded suitability assessment for 48 major crops in two input levels (i.e., high, low), and two water supply regimes (i.e., irrigated or rainfed) at 5 arcmin resolution. The correspondence between GAEZ v4.0's crop categories and SPAM is presented in the Supplement (Table S2-4). Most of the SPAM2010 crops are included in GAEZ's crop categories, those not included are assigned values from similar crops. The suitability index in three regimes (irrigated (suit\_i), rainfed and high input (suit\_h), rainfed and low input (suit\_l)) were selected as input indicators. GAEZ layers are provided by time periods in a 30 years' interval, including time period (1961-1990, 1971-2000, 1981-2010). These data layers were aggregated in coincidence year according to Table S3-4. Some crop types which have missing values in irrigated regimes use maximum value of high input regime and low input regime as a substitute.

Table S3-4. Aggregation process of GAEZ variables from multiple time periods

| <b>Time period</b> | <b>Input GAEZ layers</b>                      | <b>Aggregate method</b> |
|--------------------|-----------------------------------------------|-------------------------|
| 1961-1970          | Time Period (1961-1990)                       | Average                 |
| 1971-1980          | Time Period (1961-1990, 1971-2000)            | Average                 |
| 1981-1990          | Time Period (1961-1990, 1971-2000, 1981-2010) | Average                 |
| 1991-2000          | Time Period (1971-2000, 1981-2010)            | Average                 |
| 2001-2022          | Time Period (1981-2010)                       | Average                 |

### S3-6 Potential yield

Potential yield has a greater impact on farmer decisions when multiple crops are suitable to cultivate, this variable could also be accessed by GAEZv4.0 product in two input levels and two water supply regimes. GAEZv4.0 produces a gridded potential yield assessment for 48 major crops in two input levels (i.e., high, low), and two water supply regimes (i.e., irrigated or rainfed) at 5 arcmin resolution. The potential yield in three regimes (irrigated (potYield\_i), rainfed and high input (potYield\_h), rainfed and low input (potYield\_l)) were selected as input indicators. GAEZ layers are provided by time periods in a 30 years' interval, including time period (1961-1990, 1971-2000, 1981-2010). These data layers were aggregated in coincidence year according to Table S3-4. Some crop types which have missing values in irrigated regimes use maximum value of high input regime and low input regime as a substitute.

### S3-7 Cropland extent

Firstly, cropland maps determine where and to which extent crops could be cultivated (also in Section 2.3). Here, we used FROM-GLC Plus Global Land Cover Products (1982-2021, 1km subpixel) to extract cropland extent from 1982 to 2021 <sup>64</sup>. In periods where there are rarely remotely sensed images (before the 1980s), GCD (Global Cropland Dataset) which is produced by spatially allocating cropland statistics was used as extent <sup>65</sup> (Table S3-5).

Table S3-5. Cropland layers used in different time periods

| Time period | Cropland layers                    |
|-------------|------------------------------------|
| 1961-1969   | GCD (1960AD)                       |
| 1970-1979   | GCD (1970AD)                       |
| 1980-1981   | GCD (1980AD)                       |
| 1981-2020   | FROM-GLC Plus (Corresponding year) |
| 2021-2022   | FROM-GLC Plus (2021)               |

Given that crop production may take place over several seasons within a year, we also multiplied the cropland extent by the cropping intensity to get the annual maximum harvested area. Annual global cropping intensity datasets (GCI) cover periods from 2001 to 2019 <sup>66</sup>. For the remaining years, data from the nearest year is used as a substitute (Table S3-6).

Table S3-6. Cropping intensity datasets used in different time periods

| Time period | Cropping intensity datasets |
|-------------|-----------------------------|
| 1961-2000   | GCI (2001)                  |
| 2001-2019   | GCI (Corresponding year)    |
| 2020-2022   | GCI (2019)                  |

### S3-8 Irrigation area

we integrated two datasets (HID and SPAM) to extract irrigation area proportion in a long time series. HID (historical irrigation data set) provides estimates of the temporal development of the area equipped for irrigation from 1900 to 2005 at 5 arcmin resolution <sup>67</sup>, while SPAM contains irrigation area proportion information in year 2000, 2005 and 2010. Therefore, we adopted SPAM as a source of irrigation area after 2000, and adopted HID before 2000. For the remaining years which are not included in the periods of these two datasets, data from the nearest year is used as a substitute (Table S3-7). We divide the area of irrigated land by the area of cropland to get the proportion of irrigated land, and the proportion of rainfed cropland is defined as the remaining proportion (the sum of the two equals 1). Since the input cropland area data set may be inconsistent with the irrigated area, when the cropland area is less than the irrigated area, the cropland area is increased to equal to the irrigated area.



Table S3-7. Irrigation area datasets used in different time periods

| <b>Time period</b> | <b>Irrigation area datasets</b> |
|--------------------|---------------------------------|
| 1961-1964          | HID (1960)                      |
| 1965-1974          | HID (1970)                      |
| 1975-1982          | HID (1980)                      |
| 1983-1987          | HID (1985)                      |
| 1988-1992          | HID (1990)                      |
| 1992-1997          | HID (1995)                      |
| 1998-2002          | SPAM (2000)                     |
| 2003-2007          | SPAM (2005)                     |
| 2008-2022          | SPAM (2010)                     |

### S3-9 Field size

Global field size map was produced by visual interpretation and sample interpolation, which estimated the percentage of different field sizes, ranging from very small to very large. Samples of 130K unique locations were collected by visually interpreting very high-resolution satellite imagery from Google Maps and Bing using the Geo-Wiki application in June 2017. In this study, we used this dominant field size map as input of field size which divides field size into 5 classes: Very large, Large, Medium, Small, and Very small (Table S3-8).

Table S3-8. Field size classes and definitions

| <b>Field size</b> | <b>Definitions</b>                           |
|-------------------|----------------------------------------------|
| Very large        | fields with an area of >100 ha               |
| Large             | fields with an area between 16 and 100 ha    |
| Medium            | fields with an area between 2.56 and 16 ha   |
| Small             | fields with an area between 0.64 and 2.56 ha |
| Very small        | fields with an area <0.64 ha                 |

### S3-10 Rural population

Rural population is closely related to agricultural production, which can be considered as a measure of agricultural labor and also market accessibility. History Database of the Global Environment (HYDE version 3.2) is an internally consistent combination of historical population estimates and maps for land use. In this dataset, population is represented by maps of total, urban, rural population, population density, and built-up area. The period covered is 10 000 before the Common Era (BCE) to 2017 Common Era (CE). Estimates of rural population from HYDE v3.2 were selected as an indicator. For the remaining years which are not included in the periods of HYDE v3.2, data from the nearest year is used as a substitute (Table S3-9).

Table S3-9. Rural population layers used in different time periods

| Time period | Cropland layers           |
|-------------|---------------------------|
| 1961-1969   | HYDE (1960AD)             |
| 1970-1979   | HYDE (1970AD)             |
| 1980-1989   | HYDE (1980AD)             |
| 1990-1999   | HYDE (1990AD)             |
| 2000-2017   | HYDE (Corresponding year) |
| 2018-2022   | HYDE (2017AD)             |

### S3-11 Location variables

We used functions in Google Earth Engine (`ee.Image.pixelLonLat()`) to extract longitude and latitude at each pixel at 10km resolution in degrees. They are used as location variables in the spatiotemporal dynamic modeling.

Table 3-10 spatial indicators used to generate probabilistic layers of crop-specific area

| ID | Name            | Year                   | Resolution | Group       | Source                             |
|----|-----------------|------------------------|------------|-------------|------------------------------------|
| 1  | prec            | 1961-2022              | 0.1 degree | climate     | ERA5-Land                          |
| 2  | temp            | 1961-2022              | 0.1 degree | climate     | ERA5-Land                          |
| 3  | gdd             | 1961-2022              | 0.1 degree | climate     | ERA5-Land                          |
| 4  | radi_down       | 1961-2022              | 0.1 degree | climate     | ERA5-Land                          |
| 5  | evap_veg        | 1961-2022              | 0.1 degree | climate     | ERA5-Land                          |
| 6  | Irrigation_prop | 1960-1995 <sup>1</sup> | 5 arcmin   | agro-system | HID                                |
|    |                 | 2000,2005,2010         | 5 arcmin   |             | SPAM                               |
| 7  | Rainfed_prop    | 1660-1995 <sup>1</sup> | 5 arcmin   | agro-system | HID                                |
|    |                 | 2000,2005,2010         | 5 arcmin   |             | SPAM                               |
| 8  | suit_i          | 1961-2010 <sup>2</sup> | 5 arcmin   | suitability | GAEZ v4.0                          |
| 9  | suit_h          | 1961-2010 <sup>2</sup> | 5 arcmin   | suitability | GAEZ v4.0                          |
| 10 | suit_l          | 1961-2010 <sup>2</sup> | 5 arcmin   | suitability | GAEZ v4.0                          |
| 11 | potYield_i      | 1961-2010 <sup>2</sup> | 5 arcmin   | potYield    | GAEZ v4.0                          |
| 12 | potYield_h      | 1961-2010 <sup>2</sup> | 5 arcmin   | potYield    | GAEZ v4.0                          |
| 13 | potYield_l      | 1961-2010 <sup>2</sup> | 5 arcmin   | potYield    | GAEZ v4.0                          |
| 14 | soil_water      | 1950-2017 <sup>3</sup> | 250m       | soil        | OpenlandMap                        |
| 15 | soil_texture    | 1950-2017 <sup>3</sup> | 250m       | soil        | OpenlandMap                        |
| 16 | soil_sand       | 1950-2017 <sup>3</sup> | 250m       | soil        | OpenlandMap                        |
| 17 | soil_pH         | 1950-2017 <sup>3</sup> | 250m       | soil        | OpenlandMap                        |
| 18 | soil_orgnC      | 1950-2017 <sup>3</sup> | 250m       | soil        | OpenlandMap                        |
| 19 | soil_clay       | 1950-2017 <sup>3</sup> | 250m       | soil        | OpenlandMap                        |
| 20 | rural_pop       | 1960-2017 <sup>4</sup> | 5 arcmin   | agro-system | HYDE                               |
| 21 | field_size      | ~2017                  | 600m       | agro-system | (Lesiv et al., 2019) <sup>68</sup> |
| 22 | slope           | 2010                   | 7.5 arcsec | terrain     | GMTED2010                          |
| 23 | elevation       | 2010                   | 7.5 arcsec | terrain     | GMTED2010                          |
| 24 | cropland        | 1960,1970,1980         | 1km        | agro-system | GCD                                |
|    |                 | 1982-2021              | 1km        |             | FROM-GLC plus                      |
| 25 | longitude       | /                      | /          | location    | /                                  |
| 26 | latitude        | /                      | /          | location    | /                                  |

<sup>1</sup> here refers to multiple periods from 1960 to 1995. More details in Supplement (Section S3-7).

<sup>2</sup> here refers to multiple periods from 1961 to 2010. More details in Supplement (Table S3-3).

<sup>3</sup> here represents the overall situation from 1950 to 2017.

<sup>4</sup> here refers to multiple periods from 1960 to 2017. More details in Supplement (Section S3-9).

## S4. Results validation and analysis

### S4-1 Data comparison

Table S4-1 Comparison between our results (2005) and SPAM2005 in Africa at the grid level.

| Crop type              | short name | RMSE(ha) | R <sup>2</sup> |
|------------------------|------------|----------|----------------|
| arabica coffee         | acof       | 242.28   | 0.41           |
| banana                 | bana       | 258.04   | 0.12           |
| barley                 | barl       | 432.62   | 0.56           |
| bean                   | bean       | 208.29   | 0.50           |
| cassava                | cass       | 254.71   | 0.51           |
| chickpea               | chic       | 102.28   | 0.30           |
| coconut                | cnut       | 358.48   | 0.27           |
| cocoa                  | coco       | 649.86   | 0.48           |
| cotton                 | cott       | 204.45   | 0.32           |
| cowpea                 | cowp       | 252.59   | 0.74           |
| groundnut              | grou       | 155.00   | 0.44           |
| lentil                 | lent       | 74.32    | 0.18           |
| maize                  | maiz       | 359.99   | 0.49           |
| other cereals          | ocer       | 404.13   | 0.46           |
| other fibre crops ofib | ofib       | 50.43    | 0.06           |
| oilpalm                | oilp       | 538.95   | 0.54           |
| other oil crops        | ooil       | 382.80   | 0.38           |
| other pulses           | opul       | 154.85   | 0.30           |
| other roots            | orts       | 179.34   | 0.25           |
| pigeonpea              | pige       | 258.49   | 0.38           |
| plantain               | plnt       | 446.98   | 0.25           |
| pearl millet           | pmil       | 459.42   | 0.61           |
| potato                 | pota       | 136.65   | 0.19           |
| rapeseed               | rape       | 32.66    | 0.19           |
| robusta coffee         | rcof       | 148.83   | 0.41           |
| rest of crops          | rest       | 244.43   | 0.11           |
| rice                   | rice       | 246.93   | 0.38           |
| sesameseed             | sesa       | 156.71   | 0.52           |
| small millet           | smil       | 188.21   | 0.47           |
| sorghum                | sorg       | 564.46   | 0.60           |
| soybean                | soyb       | 71.95    | 0.48           |
| sugarbeet              | sugb       | 242.72   | 0.15           |
| sugarcane              | sugc       | 205.37   | 0.28           |
| sunflower              | sunf       | 132.86   | 0.38           |
| sweet potato           | swpo       | 138.19   | 0.32           |

| Crop type       | short name | RMSE(ha) | R <sup>2</sup> |
|-----------------|------------|----------|----------------|
| tea             | teas       | 81.37    | 0.67           |
| temperate fruit | temf       | 69.64    | 0.27           |
| tobacco         | toba       | 36.72    | 0.38           |
| tropical fruit  | trof       | 170.41   | 0.15           |
| vegetables      | vege       | 192.27   | 0.17           |
| wheat           | whea       | 448.33   | 0.66           |
| yams            | yams       | 174.55   | 0.62           |

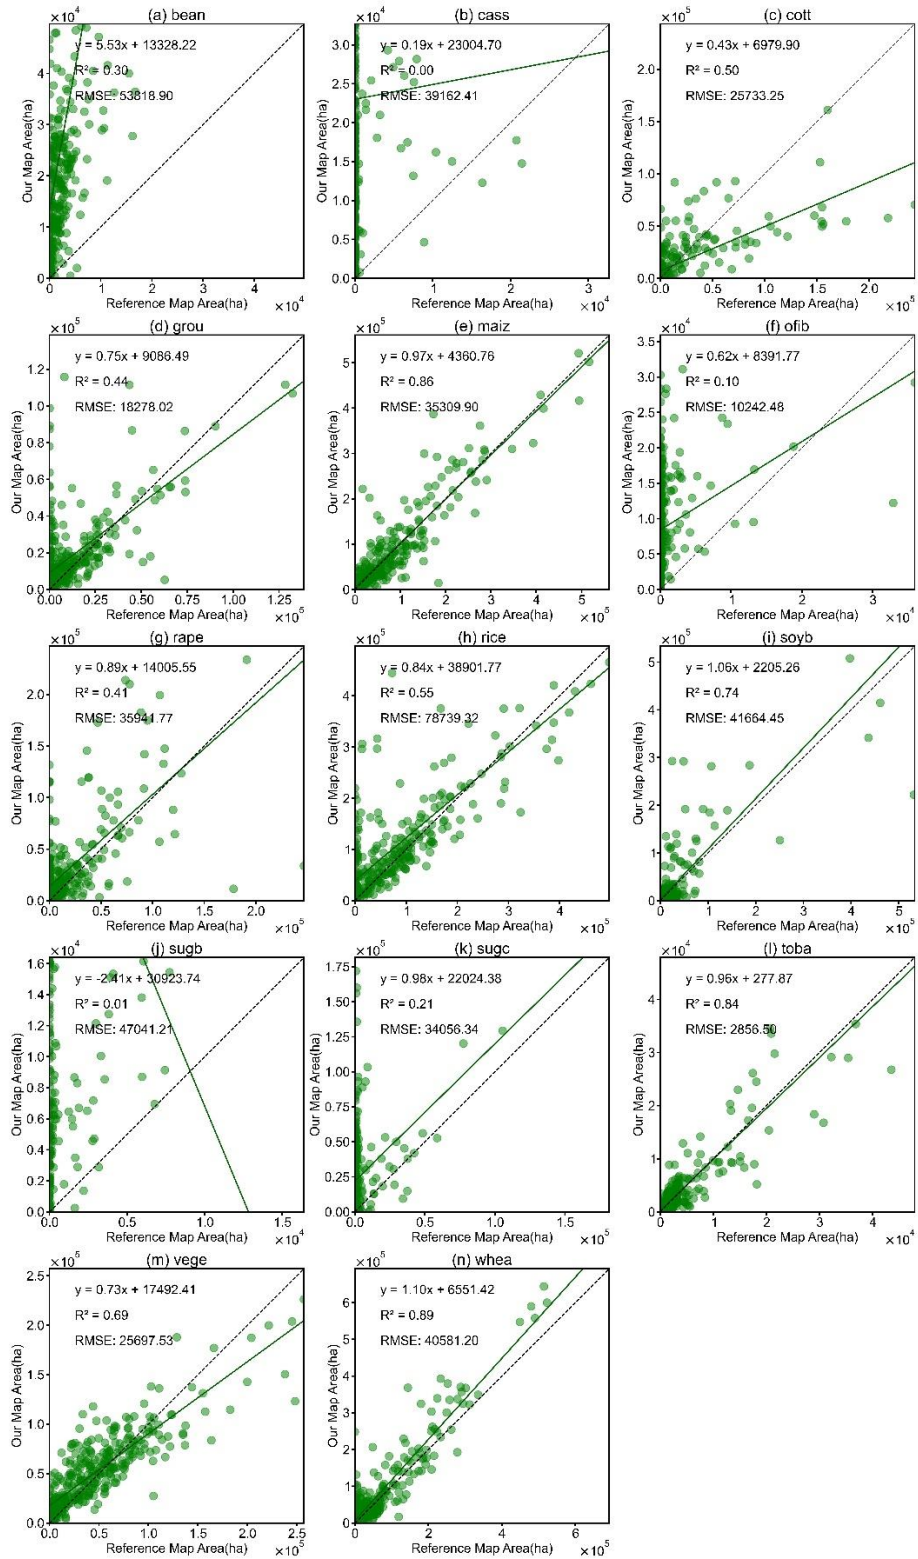

Fig S4-1. Comparison between our results (2005) and SPAM2005 in China at the Administrative unit (adm2 level), including a) bean; b) roots and tubers; c) cotton; d) groundnut; e) maize; f) bast fiber; g) rapeseed; h) rice; i) soybean; j) sugar beet; k) sugarcane; l) tobacco; m) vegetables; n) wheat.

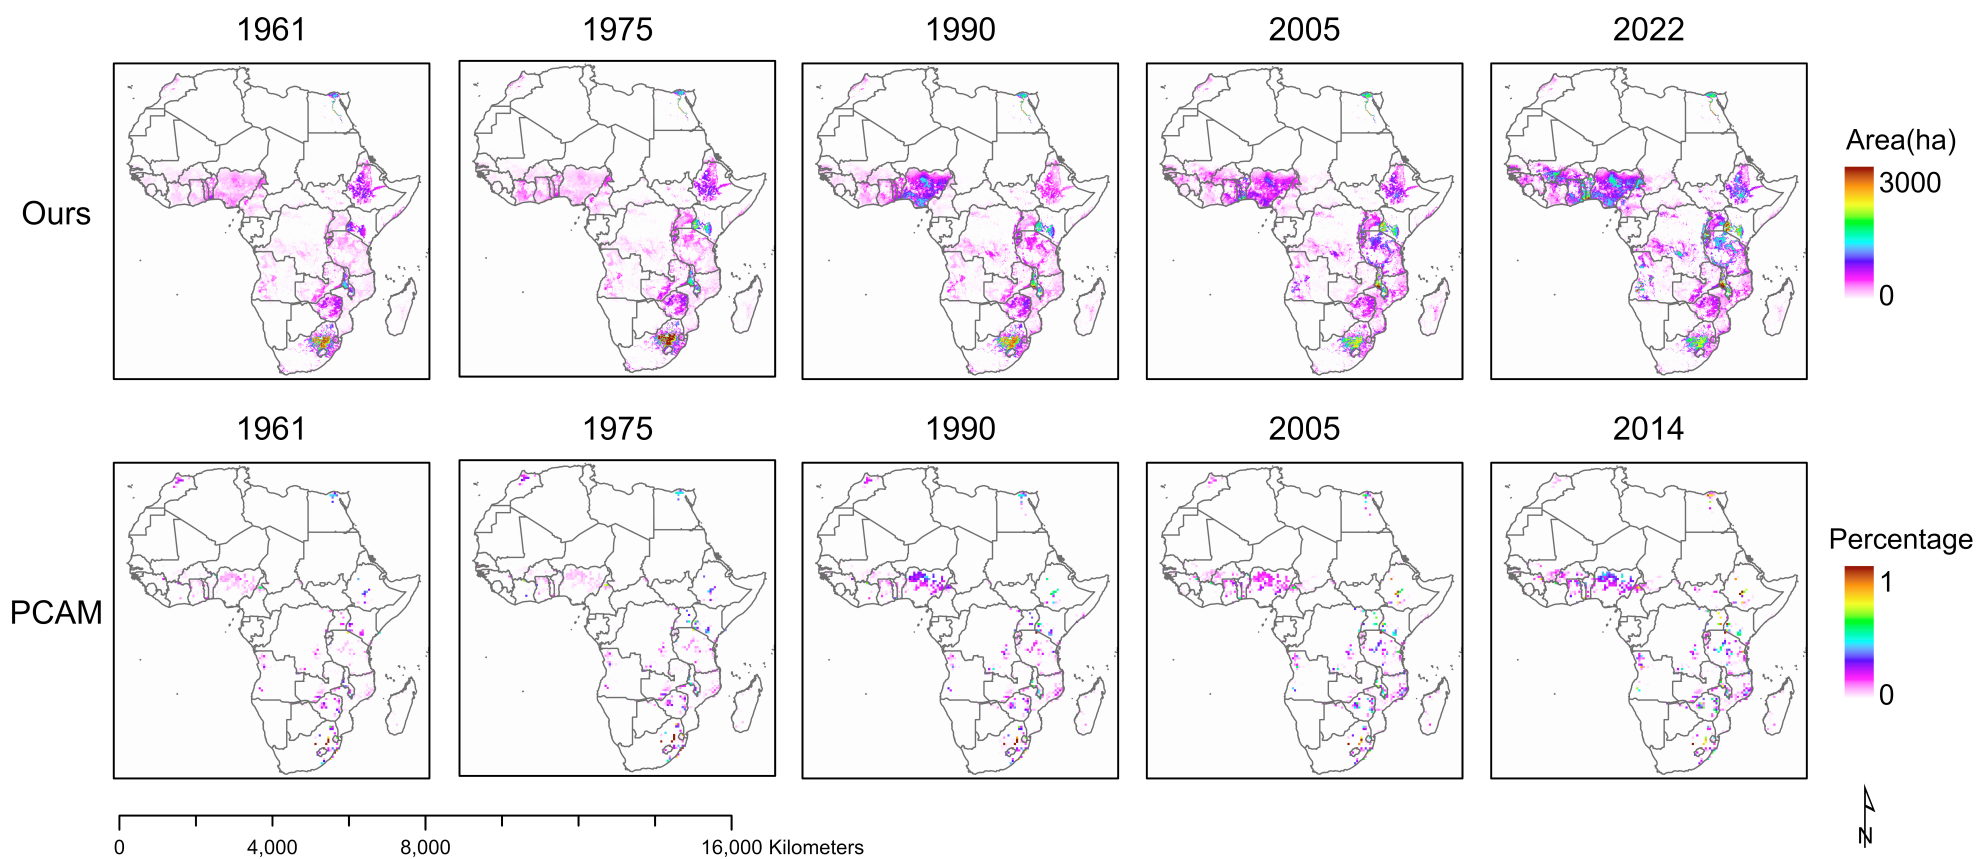

Fig 4-2. Visual comparison of our products with PCAM in Africa (Maize as an example).

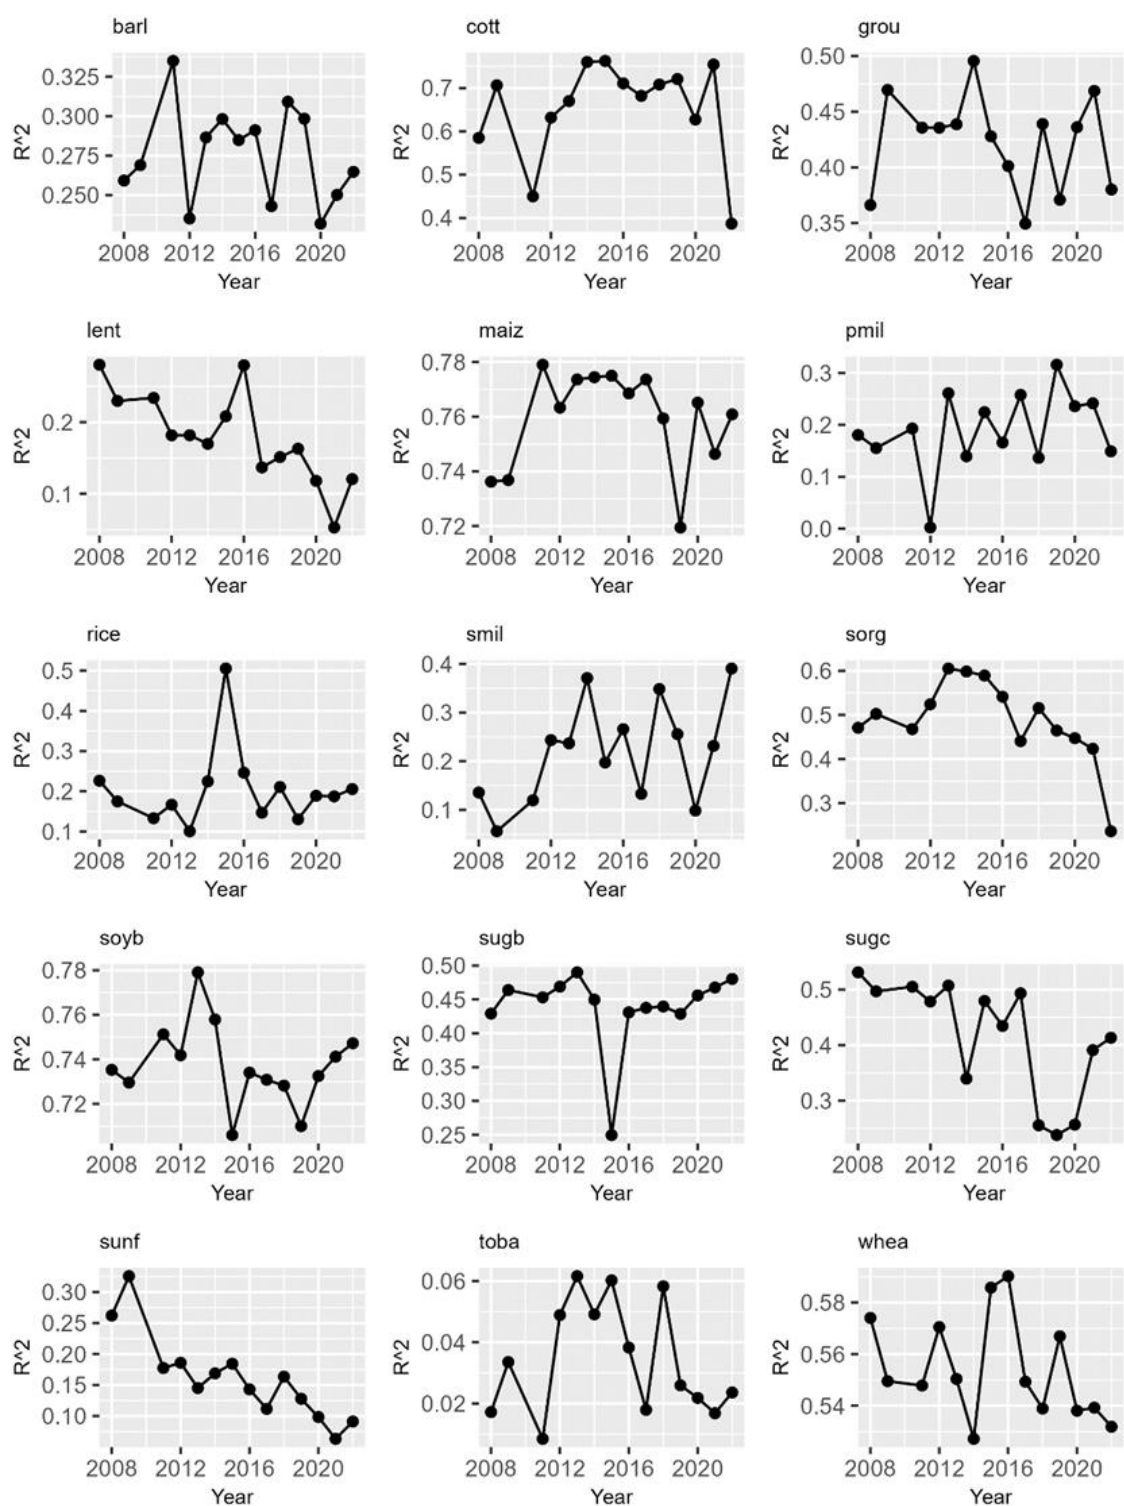

Fig S4-3. Comparison between our results (2008-2022) and CDL in USA at the grid level ( $R^2$ ).



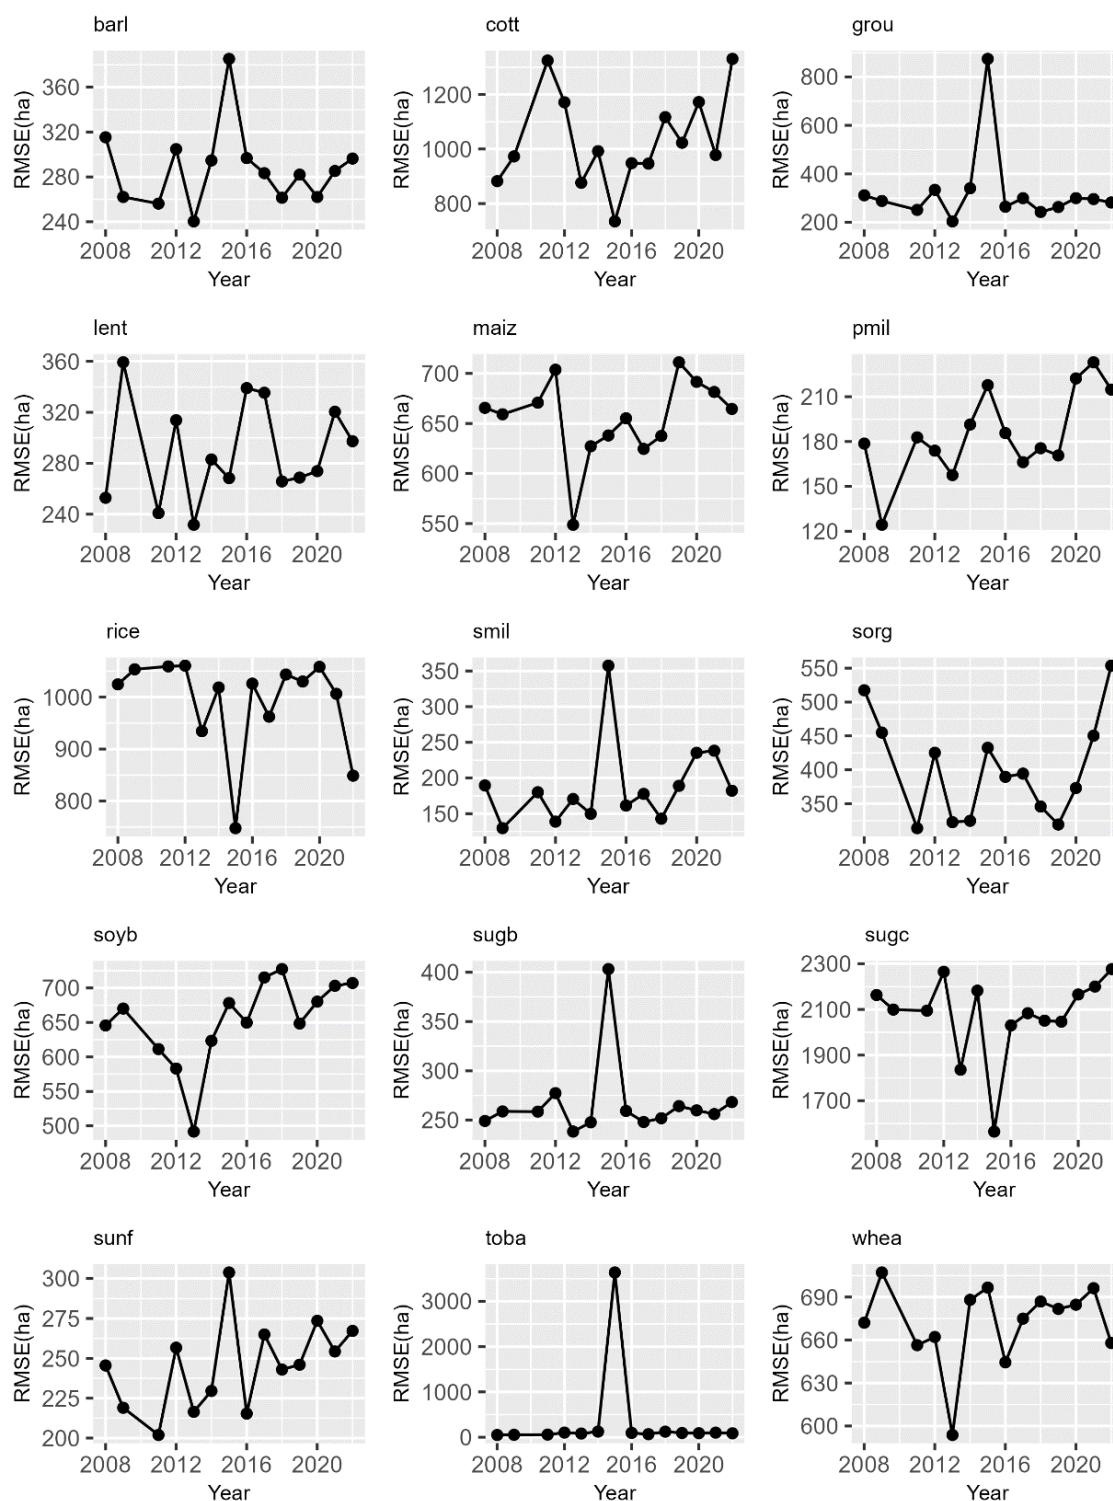

Fig S4-4. Comparison between our results (2008-2022) and CDL in USA at the grid level (RMSE).

## S4-2 Model performance and interpretability

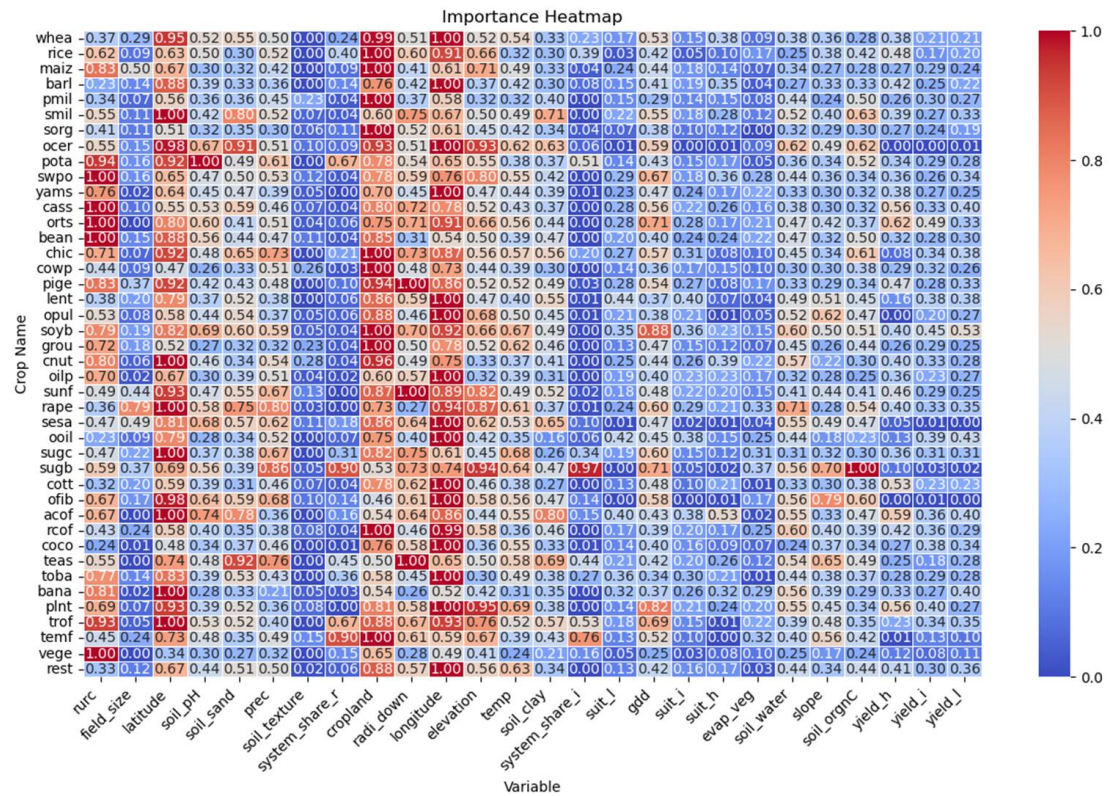

Fig S4-5. Importance analysis of spatial indicators used in RF models in Africa.

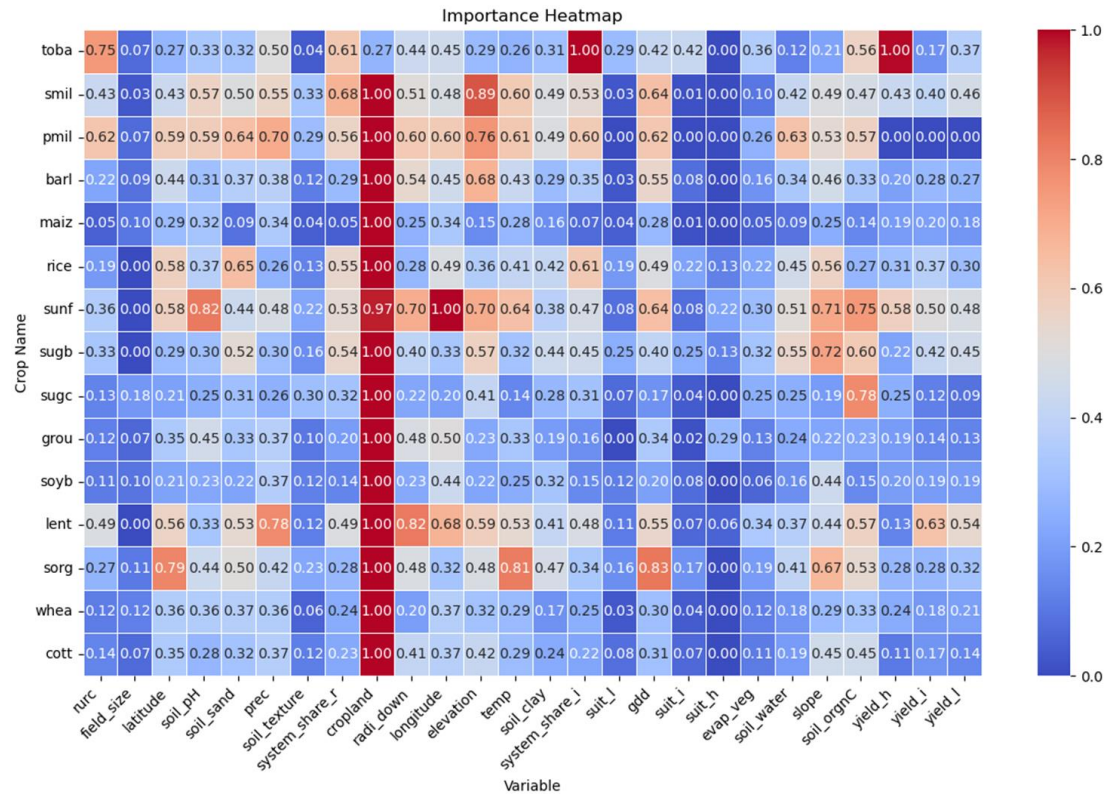

Fig S4-6. Importance analysis of spatial indicators used in RF models in USA



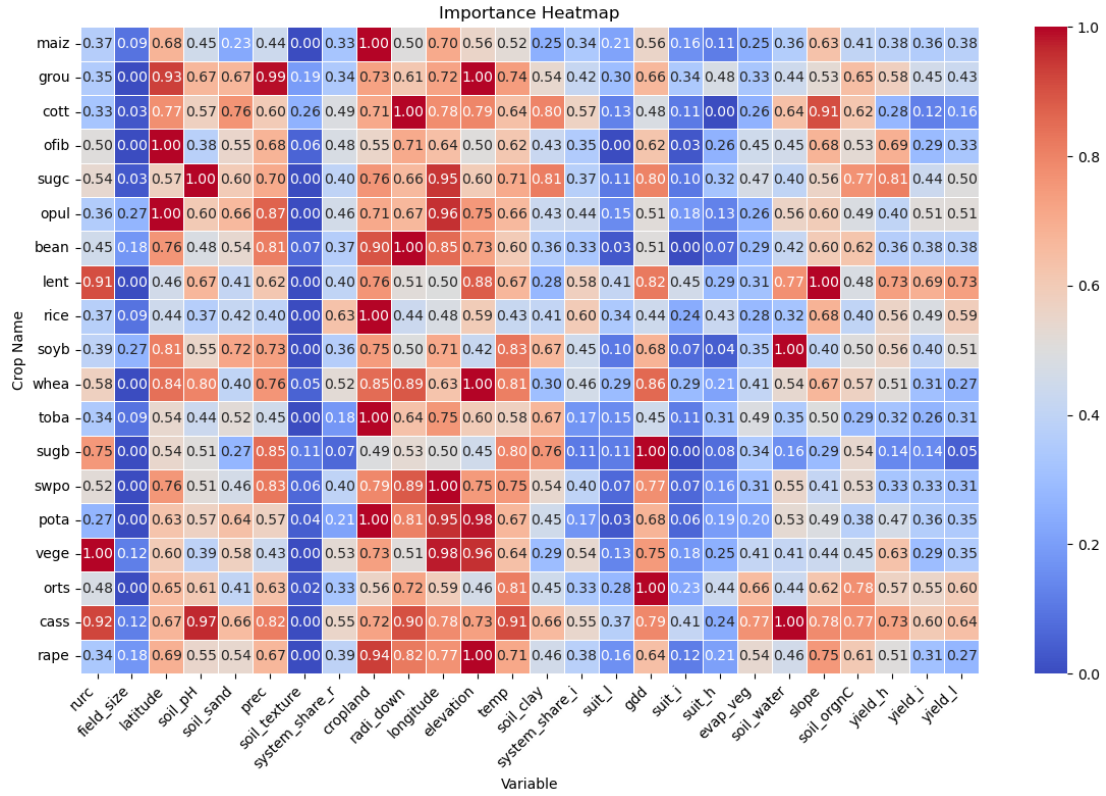

Fig S4-7. Importance analysis of spatial indicators used in RF models in China (using SPAM2010 as training data).

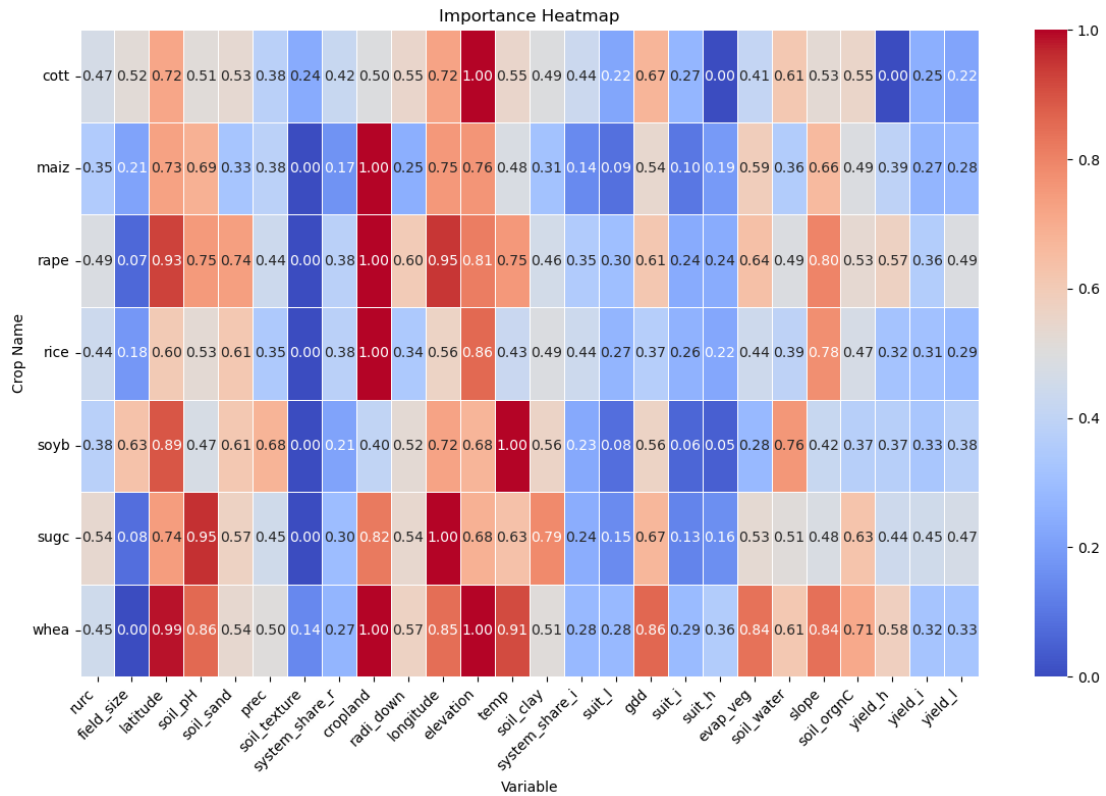

Fig S4-8. Importance analysis of spatial indicators used in RF models in China (using multi-year mapping results as training data).

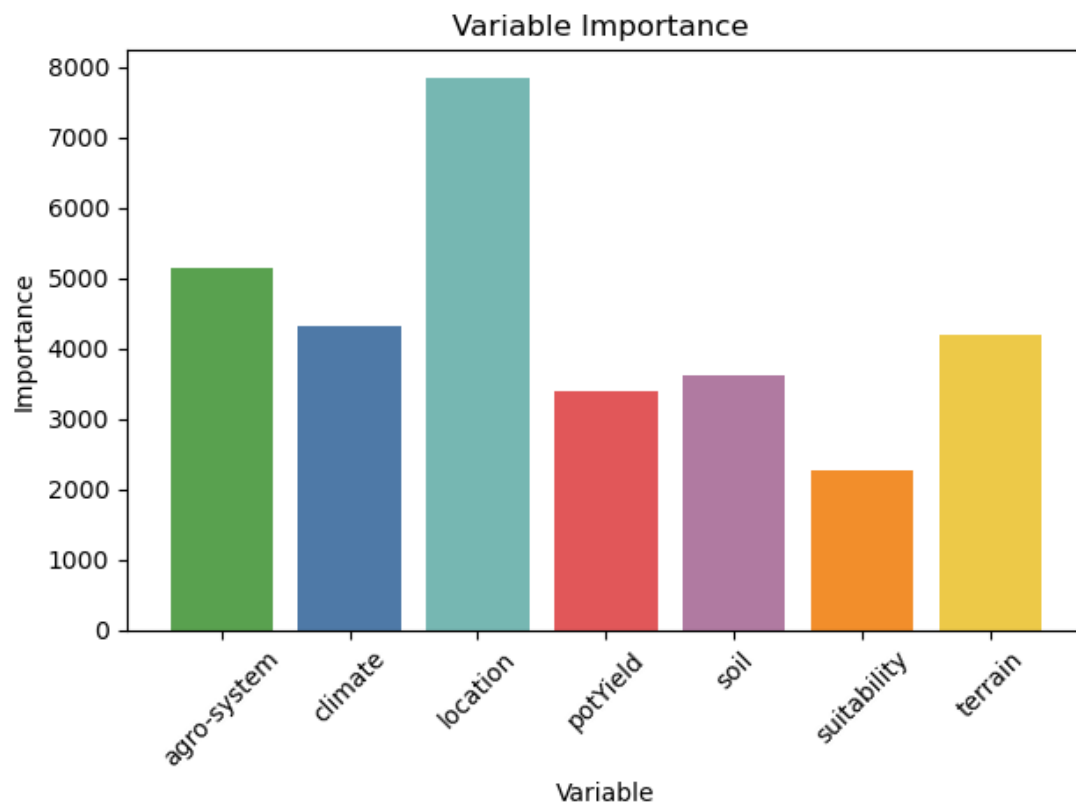

Fig S4-9. Importance of spatial indicators groups used in RF models in Africa.

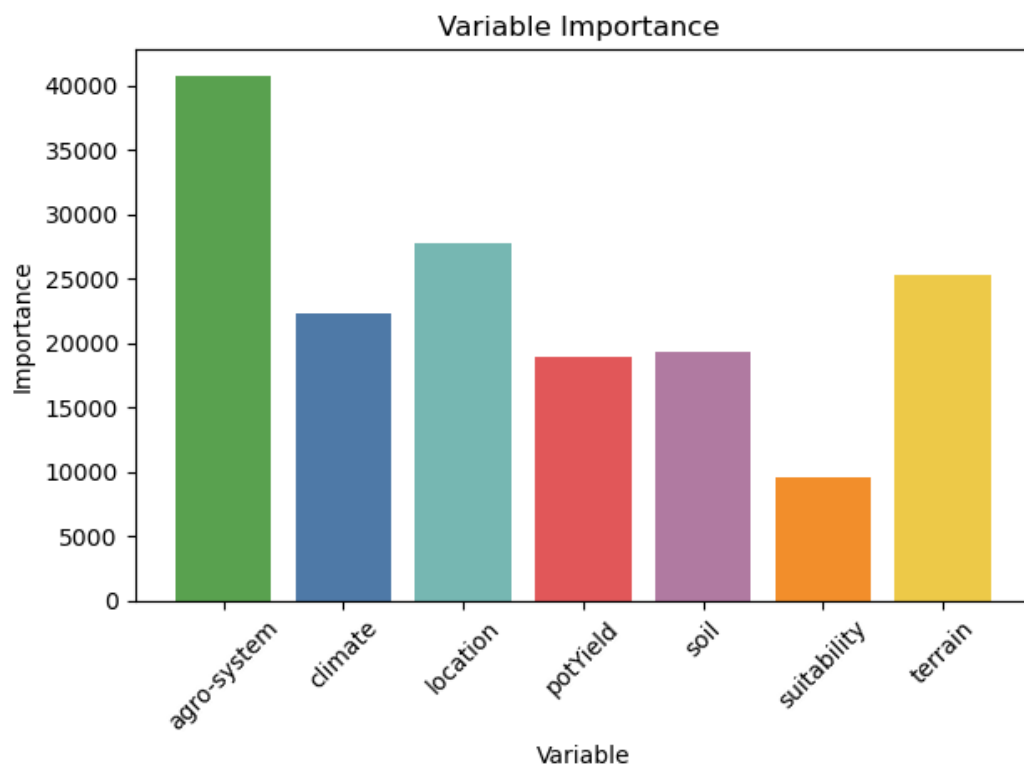

Fig S4-10. Importance of spatial indicators groups used in RF models in USA.

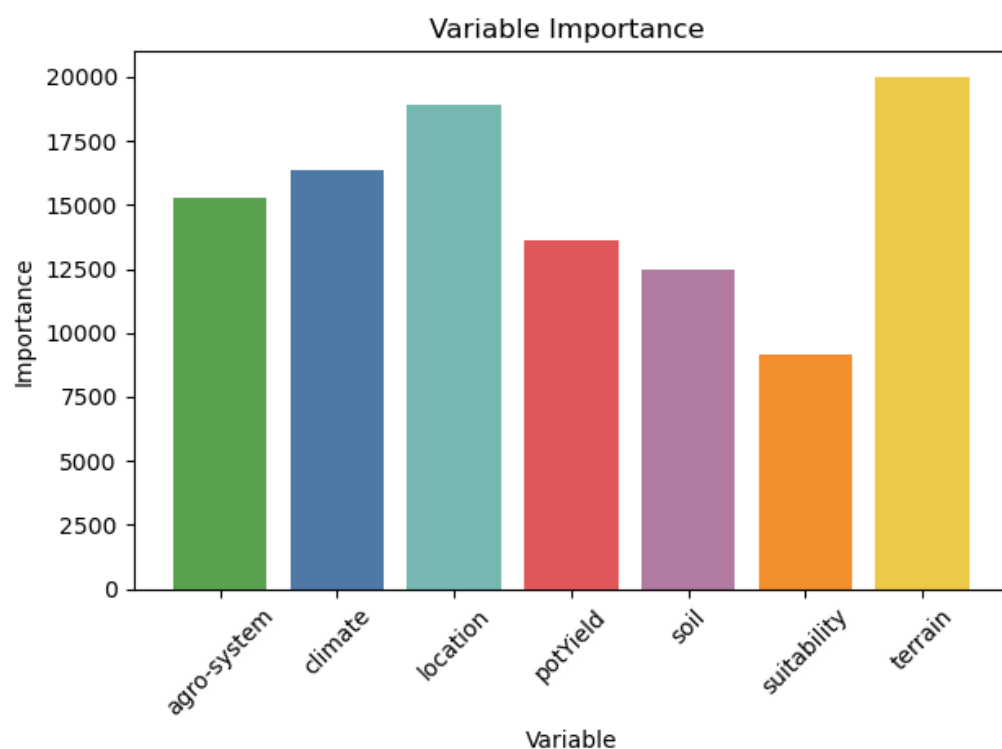

Fig S4-11. Importance of spatial indicators groups used in RF models in China (using SPAM2010 as training data).

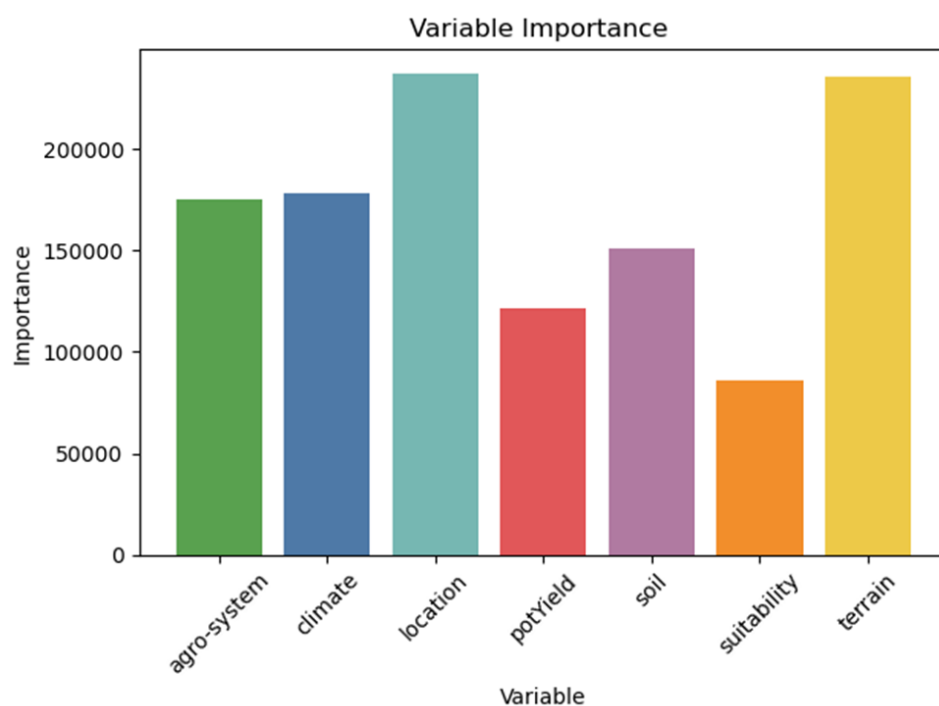

Fig S4-12. Importance of spatial indicators groups used in RF models in China (using multi-year mapping results as training data).

## Reference:

- 1 Leff, B., Ramankutty, N. & Foley, J. A. Geographic distribution of major crops across the world. *Global Biogeochemical Cycles* **18**, doi:<https://doi.org/10.1029/2003GB002108> (2004).
- 2 Monfreda, C., Ramankutty, N. & Foley, J. A. Farming the planet: 2. Geographic distribution of crop areas, yields, physiological types, and net primary production in the year 2000. *Global Biogeochemical Cycles* **22**, doi:<https://doi.org/10.1029/2007GB002947> (2008).
- 3 Portmann, F. T., Siebert, S. & Döll, P. MIRCA2000—Global monthly irrigated and rainfed crop areas around the year 2000: A new high-resolution data set for agricultural and hydrological modeling. *Global Biogeochemical Cycles* **24**, doi:<https://doi.org/10.1029/2008GB003435> (2010).
- 4 You, L., Wood, S., Wood-Sichra, U. & Wu, W. Generating global crop distribution maps: From census to grid. *Agricultural Systems* **127**, 53-60, doi:<https://doi.org/10.1016/j.agsy.2014.01.002> (2014).
- 5 Institute, I. F. P. R. (eds Institute International Food Policy Research & Analysis International Institute for Applied Systems) (Harvard Dataverse, 2016).
- 6 Yu, Q. *et al.* A cultivated planet in 2010 – Part 2: The global gridded agricultural-production maps. *Earth Syst. Sci. Data* **12**, 3545-3572, doi:10.5194/essd-12-3545-2020 (2020).
- 7 Institute, I. F. P. R. *MapSPAM* (ed Institute International Food Policy Research) (Harvard Dataverse, 2020).
- 8 Fischer, G. *et al.* *Global agro-ecological zones v4—model documentation*. (Food & Agriculture Org., 2021).
- 9 Grogan, D., Froliking, S., Wisser, D., Prusevich, A. & Glidden, S. Global gridded crop harvested area, production, yield, and monthly physical area data circa 2015. *Scientific Data* **9**, 15, doi:10.1038/s41597-021-01115-2 (2022).
- 10 Becker-Reshef, I. *et al.* Crop Type Maps for Operational Global Agricultural Monitoring. *Scientific Data* **10**, 172, doi:10.1038/s41597-023-02047-9 (2023).
- 11 Ray, D. K., Ramankutty, N., Mueller, N. D., West, P. C. & Foley, J. A. Recent patterns of crop yield growth and stagnation. *Nature Communications* **3**, 1293, doi:10.1038/ncomms2296 (2012).
- 12 Jackson, N. D., Konar, M., Debaere, P. & Estes, L. Probabilistic global maps of crop-specific areas from 1961 to 2014. *Environmental Research Letters* **14**, 094023, doi:10.1088/1748-9326/ab3b93 (2019).
- 13 Hu, Q. *et al.* Integrating coarse-resolution images and agricultural statistics to generate sub-pixel crop type maps and reconciled area estimates. *Remote Sensing of Environment* **258**, 112365, doi:<https://doi.org/10.1016/j.rse.2021.112365> (2021).
- 14 Wang, Y. *et al.* Mapping Crop Distribution Patterns and Changes in China from 2000 to 2015 by Fusing Remote-Sensing, Statistics, and Knowledge-Based Crop Phenology. *Remote Sensing* **14** (2022).

- 15 Zhong, L., Hu, L., Zhou, H. & Tao, X. Deep learning based winter wheat mapping using statistical data as ground references in Kansas and northern Texas, US. *Remote Sensing of Environment* **233**, 111411, doi:<https://doi.org/10.1016/j.rse.2019.111411> (2019).
- 16 Tang, F. H. M. *et al.* CROPGRIDS: a global geo-referenced dataset of 173 crops. *Scientific Data* **11**, 413, doi:10.1038/s41597-024-03247-7 (2024).
- 17 Boryan, C., Yang, Z., Mueller, R. & Craig, M. Monitoring US agriculture: the US Department of Agriculture, National Agricultural Statistics Service, Cropland Data Layer Program. *Geocarto International* **26**, 341-358, doi:10.1080/10106049.2011.562309 (2011).
- 18 Fisette, T. *et al.* AAFC annual crop inventory. *2013 Second International Conference on Agro-Geoinformatics (Agro-Geoinformatics)*, 270-274, doi:10.1109/Argo-Geoinformatics.2013.6621920 (2013).
- 19 Agrimetrics. *Crop Map of England (CROME)*, <<https://catalogue.agrimetrics.co.uk/data-sets/12159806-24e4-4cdc-bf53-bb95fd4e8200/details>> (2023).
- 20 Géoservices. *RPG | Géoservices*, <<https://geoservices.ign.fr/rpg>> (2023).
- 21 PDOK. *Basisregistratie Gewaspercelen (BRP)*, <[https://service.pdok.nl/rvo/brpgewaspercelen/atom/v1\\_0/basisregistratie\\_gewaspercelen\\_brp.xml](https://service.pdok.nl/rvo/brpgewaspercelen/atom/v1_0/basisregistratie_gewaspercelen_brp.xml)> (2023).
- 22 Blickensdörfer, L. *et al.* Mapping of crop types and crop sequences with combined time series of Sentinel-1, Sentinel-2 and Landsat 8 data for Germany. *Remote Sensing of Environment* **269**, 112831, doi:<https://doi.org/10.1016/j.rse.2021.112831> (2022).
- 23 d'Andrimont, R. *et al.* From parcel to continental scale – A first European crop type map based on Sentinel-1 and LUCAS Copernicus in-situ observations. *Remote Sensing of Environment* **266**, 112708, doi:<https://doi.org/10.1016/j.rse.2021.112708> (2021).
- 24 FAO. *Crop type (Afghanistan - 2020 - 10m - 6 classes) - EOSTAT - "FAO catalog"*, <<https://data.apps.fao.org/catalog/dataset/3cf3376c-50fa-42a6-8bfe-070a56fd2112>> (2021).
- 25 FAO. *Crop type (Senegal - 2018 - 10m) - EOSTAT - "FAO catalog"*, <<https://data.apps.fao.org/catalog/iso/5c377b2b-3c2e-4b70-afd7-0c80900b68bb>> (2021).
- 26 FAO. *Crop type (Ecuador - 2021 - 10m) - EOSTAT - "FAO catalog"*, <<https://data.apps.fao.org/catalog/iso/df7c7f01-3fa2-4209-adf5-4bcf5b79f344>> (2021).
- 27 ABARES. *Land use of Australia 2010–11 to 2015–16, 250 m*, <[https://www.agriculture.gov.au/abares/aclump/land-use/land-use-of-australia-2010-11\\_2015-16](https://www.agriculture.gov.au/abares/aclump/land-use/land-use-of-australia-2010-11_2015-16)> (2022).
- 28 EORA, J. *High-Resolution Land-Use and Land-Cover Map of Japan [2018 ~ 2020]*, <[https://www.eorc.jaxa.jp/ALOS/en/dataset/lulc/lulc\\_v2111\\_e.htm](https://www.eorc.jaxa.jp/ALOS/en/dataset/lulc/lulc_v2111_e.htm)>

- (2021).
- 29 Descals, A. *et al.* High-resolution global map of smallholder and industrial closed-canopy oil palm plantations. *Earth Syst. Sci. Data* **13**, 1211-1231, doi:10.5194/essd-13-1211-2021 (2021).
  - 30 Du, Z. *et al.* A global map of planting years of plantations. *Scientific Data* **9**, 141, doi:10.1038/s41597-022-01260-2 (2022).
  - 31 Han, J. *et al.* The RapeseedMap10 database: annual maps of rapeseed at a spatial resolution of 10m based on multi-source data. *Earth Syst. Sci. Data* **13**, 2857-2874, doi:10.5194/essd-13-2857-2021 (2021).
  - 32 Song, X.-P. *et al.* Massive soybean expansion in South America since 2000 and implications for conservation. *Nature Sustainability* **4**, 784-792, doi:10.1038/s41893-021-00729-z (2021).
  - 33 Danylo, O. *et al.* A map of the extent and year of detection of oil palm plantations in Indonesia, Malaysia and Thailand. *Scientific Data* **8**, 96, doi:10.1038/s41597-021-00867-1 (2021).
  - 34 Han, J. *et al.* Annual paddy rice planting area and cropping intensity datasets and their dynamics in the Asian monsoon region from 2000 to 2020. *Agricultural Systems* **200**, 103437, doi:<https://doi.org/10.1016/j.agry.2022.103437> (2022).
  - 35 Abu, I.-O., Szantoi, Z., Brink, A., Robuchon, M. & Thiel, M. Detecting cocoa plantations in Côte d'Ivoire and Ghana and their implications on protected areas. *Ecological Indicators* **129**, 107863, doi:<https://doi.org/10.1016/j.ecolind.2021.107863> (2021).
  - 36 Qiu, B., Huang, Y., Chen, C., Tang, Z. & Zou, F. Mapping spatiotemporal dynamics of maize in China from 2005 to 2017 through designing leaf moisture based indicator from Normalized Multi-band Drought Index. *Computers and Electronics in Agriculture* **153**, 82-93, doi:<https://doi.org/10.1016/j.compag.2018.07.039> (2018).
  - 37 Qiu, B. *et al.* Maps of cropping patterns in China during 2015–2021. *Scientific Data* **9**, 479, doi:10.1038/s41597-022-01589-8 (2022).
  - 38 Singha, M., Dong, J., Zhang, G. & Xiao, X. High resolution paddy rice maps in cloud-prone Bangladesh and Northeast India using Sentinel-1 data. *Scientific Data* **6**, 26, doi:10.1038/s41597-019-0036-3 (2019).
  - 39 Dong, Q. *et al.* Mapping Winter Wheat in North China Using Sentinel 2A/B Data: A Method Based on Phenology-Time Weighted Dynamic Time Warping. *Remote Sensing* **12** (2020).
  - 40 Zang, Y. *et al.* Mapping rapeseed in China during 2017-2021 using Sentinel data: an automated approach integrating rule-based sample generation and a one-class classifier (RSG-OC). *GIScience & Remote Sensing* **60**, 2163576, doi:10.1080/15481603.2022.2163576 (2023).
  - 41 You, N. *et al.* The 10-m crop type maps in Northeast China during 2017–2019. *Scientific Data* **8**, 41, doi:10.1038/s41597-021-00827-9 (2021).



- 42 Xuan, F. *et al.* Mapping crop type in Northeast China during 2013–2021 using automatic sampling and tile-based image classification. *International Journal of Applied Earth Observation and Geoinformation* **117**, 103178, doi:<https://doi.org/10.1016/j.jag.2022.103178> (2023).
- 43 Luo, Y. *et al.* Identifying the spatiotemporal changes of annual harvesting areas for three staple crops in China by integrating multi-data sources. *Environmental Research Letters* **15**, 074003, doi:10.1088/1748-9326/ab80f0 (2020).
- 44 Dong, J. *et al.* Early-season mapping of winter wheat in China based on Landsat and Sentinel images. *Earth Syst. Sci. Data* **12**, 3081-3095, doi:10.5194/essd-12-3081-2020 (2020).
- 45 Pan, B. *et al.* High Resolution Distribution Dataset of Double-Season Paddy Rice in China. *Remote Sensing* **13** (2021).
- 46 Shen, R. *et al.* A 30 m Resolution Distribution Map of Maize for China Based on Landsat and Sentinel Images. *Journal of Remote Sensing*, doi:10.34133/2022/9846712 (2022).
- 47 Zheng, Y., dos Santos Luciano, A. C., Dong, J. & Yuan, W. High-resolution map of sugarcane cultivation in Brazil using a phenology-based method. *Earth Syst. Sci. Data* **14**, 2065-2080, doi:10.5194/essd-14-2065-2022 (2022).
- 48 Zheng, Y. *et al.* Development of a Phenology-Based Method for Identifying Sugarcane Plantation Areas in China Using High-Resolution Satellite Datasets. *Remote Sensing* **14** (2022).
- 49 Huang, X. *et al.* High-Resolution Mapping of Winter Cereals in Europe by Time Series Landsat and Sentinel Images for 2016-2020. *Remote Sensing* **14** (2022).
- 50 Wang, S., Di Tommaso, S., Deines, J. M. & Lobell, D. B. Mapping twenty years of corn and soybean across the US Midwest using the Landsat archive. *Scientific Data* **7**, 307, doi:10.1038/s41597-020-00646-4 (2020).
- 51 Liu, W. & Zhang, H. Mapping annual 10 m rapeseed extent using multisource data in the Yangtze River Economic Belt of China (2017–2021) on Google Earth Engine. *International Journal of Applied Earth Observation and Geoinformation* **117**, 103198, doi:<https://doi.org/10.1016/j.jag.2023.103198> (2023).
- 52 Sun, C. *et al.* Twenty-meter annual paddy rice area map for mainland Southeast Asia using Sentinel-1 synthetic-aperture-radar data. *Earth Syst. Sci. Data* **15**, 1501-1520, doi:10.5194/essd-15-1501-2023 (2023).
- 53 Li, H. *et al.* Development of a 10-m resolution maize and soybean map over China: Matching satellite-based crop classification with sample-based area estimation. *Remote Sensing of Environment* **294**, 113623, doi:<https://doi.org/10.1016/j.rse.2023.113623> (2023).
- 54 Han, J. *et al.* NESEA-Rice10: high-resolution annual paddy rice maps for Northeast and Southeast Asia from 2017 to 2019. *Earth Syst. Sci. Data* **13**, 5969-5986, doi:10.5194/essd-13-5969-2021 (2021).
- 55 Luo, Y. *et al.* Developing High-Resolution Crop Maps for Major Crops in the

- European Union Based on Transductive Transfer Learning and Limited Ground Data. *Remote Sensing* **14** (2022).
- 56 Kang, X. *et al.* The 10-m cotton maps in Xinjiang, China during 2018–2021. *Scientific Data* **10**, 688, doi:10.1038/s41597-023-02584-3 (2023).
- 57 Xin, Q. *et al.* Satellite mapping of maize cropland in one-season planting areas of China. *Scientific Data* **10**, 437, doi:10.1038/s41597-023-02334-5 (2023).
- 58 Li, X. *et al.* Mapping annual 10-m maize cropland changes in China during 2017–2021. *Scientific Data* **10**, 765, doi:10.1038/s41597-023-02665-3 (2023).
- 59 Shen, R. *et al.* High-resolution distribution maps of single-season rice in China from 2017 to 2022. *Earth Syst. Sci. Data* **15**, 3203–3222, doi:10.5194/essd-15-3203-2023 (2023).
- 60 Liu, W. *et al.* CARM30: China annual rapeseed maps at 30 m spatial resolution from 2000 to 2022 using multi-source data. *Scientific Data* **11**, 356, doi:10.1038/s41597-024-03188-1 (2024).
- 61 Peng, Q. *et al.* A twenty-year dataset of high-resolution maize distribution in China. *Scientific Data* **10**, 658, doi:10.1038/s41597-023-02573-6 (2023).
- 62 Zhang, H. *et al.* Mapping annual 10-m soybean cropland with spatiotemporal sample migration. *Scientific Data* **11**, 439, doi:10.1038/s41597-024-03273-5 (2024).
- 63 Wang, S., Azzari, G. & Lobell, D. B. Crop type mapping without field-level labels: Random forest transfer and unsupervised clustering techniques. *Remote Sensing of Environment* **222**, 303–317, doi:<https://doi.org/10.1016/j.rse.2018.12.026> (2019).
- 64 Tian, Y., Tsendbazar, N.-E., van Leeuwen, E. & Herold, M. Mapping urban–rural differences in the worldwide achievement of sustainable development goals: land-energy-air nexus. *Environmental Research Letters* **17**, 114012, doi:10.1088/1748-9326/ac991b (2022).
- 65 Cao, B. *et al.* A 1km global cropland dataset from 10000BCE to 2100CE. *Earth Syst. Sci. Data* **13**, 5403–5421, doi:10.5194/essd-13-5403-2021 (2021).
- 66 Liu, X. *et al.* Annual dynamic dataset of global cropping intensity from 2001 to 2019. *Scientific Data* **8**, 283, doi:10.1038/s41597-021-01065-9 (2021).
- 67 Siebert, S. *et al.* A global data set of the extent of irrigated land from 1900 to 2005. *Hydrol. Earth Syst. Sci.* **19**, 1521–1545, doi:10.5194/hess-19-1521-2015 (2015).
- 68 Lesiv, M. *et al.* Estimating the global distribution of field size using crowdsourcing. *Global Change Biology* **25**, 174–186, doi:<https://doi.org/10.1111/gcb.14492> (2019).
